# The visual white matter: The application of diffusion MRI and fiber tractography to vision science

Ariel Rokem<sup>1</sup>, Hiromasa Takemura<sup>2</sup>, Andrew Bock<sup>3</sup>, K. Suzanne Scherf<sup>4</sup>, Marlene Behrmann<sup>5</sup>, Brian Wandell<sup>6</sup>, Ione Fine<sup>7</sup>, Holly Bridge<sup>8</sup>, and Franco Pestilli<sup>9</sup>

<sup>1</sup>The University of Washington eScience Institute, Seattle, WA, USA,  
<http://arokem.org>, [arokem@uw.edu](mailto:arokem@uw.edu)

<sup>2</sup>Center for Information and Neural Networks (CiNet), National Institute of Information and Communications Technology, Graduate School of Frontier Biosciences, Osaka University, Suita, Japan

<sup>3</sup>University of Pennsylvania, Philadelphia, PA, USA

<sup>4</sup>Penn State University, State College, PA, USA

<sup>5</sup>Carnegie Mellon University, Pittsburgh, PA, USA

<sup>6</sup>Stanford University, Stanford, CA, USA

<sup>7</sup>University of Washington, Seattle, WA, USA

<sup>8</sup>Oxford University

<sup>9</sup>University of Indiana, Bloomington, IN, USA, <http://pestillilab.indiana.edu>,  
[franpest@indiana.edu](mailto:franpest@indiana.edu)

Keywords: MRI, diffusion MRI, brain, white matter, brain connectivity, visual cortex, visual disability, visual development, categorical perception, face perception, software, computational modeling.

## Abstract

Visual neuroscience has traditionally focused much of its attention on understanding the response properties of single neurons or neuronal ensembles. The visual white matter and the long-range neuronal connections it supports is fundamental in establishing such neuronal response properties as well as visual function. This review article provides an introduction to measurements and methods to study the human visual white matter using diffusion MRI (dMRI). These methods allow us to measure the white matter micro- and macro-structural properties in living human individuals; they allows us to trace long-range connections between neurons in different parts of the visual system, and to measure the biophysical properties of these connections. We also review a range of findings from recent studies on connections between different visual field maps, on the effects of visual impairment on the white matter, and on the properties underlying networks that process visual information that supports visual face recognition. Finally, we discuss a few promising directions for future studies. These include new methods for analysis of MRI data, open data-sets that are becoming available to study brain connectivity and white matter properties, and open-source software for the analysis of these data.

# 1 Introduction

2 The cerebral hemispheres of the human brain can be subdivided into two primary tissue types:  
3 the white matter and the gray matter (Fields, 2008a). Whereas the gray matter contains neuronal  
4 cell bodies, the white matter contains primarily the axons of these neurons, and glial cells. The  
5 axons constitute the connections that transmit information between distal parts of the brain - *mm*  
6 to *cm* in length. Some types of glia (primarily oligodendrocytes) form an insulating layer around  
7 these axons (myelin sheaths) that allow the axons to transmit information more rapidly (Waxman  
8 and Bennett, 1972), and more accurately (Kim et al., 2013), and reduce their energy consumption  
9 (Hartline and Colman, 2007).

10 Much of neuroscience has historically focused on understanding the functional response prop-  
11 erties of individual neurons and cortical regions (Fields, 2013, 2004). It has often been implicitly  
12 assumed that white matter, and the long-range neuronal connections it supports have a binary na-  
13 ture: either they are connected and functioning, or they are disconnected. However, more recently  
14 there is an increasing focus on the role that the variety of properties of the white matter may play  
15 in neural computation (Bullock et al., 2005; Jbabdi et al., 2015; Reid, 2012; Sporns et al., 2005)  
16 together with a growing understanding of the importance of the brain networks composed of these  
17 connections in cognitive function (Petersen and Sporns, 2015).

18 The renewed interest in white matter is in part due to the introduction of new technologies.  
19 Long-range connectivity between parts of the brain can be measured in a variety of ways. For  
20 example, functional magnetic resonance imaging (fMRI) is used to measure correlations between  
21 the blood-oxygenation level dependent (BOLD) signal in different parts of the brain. In this review,  
22 we focus on results from diffusion-weighted Magnetic Resonance Imaging technology (dMRI). To-  
23 gether with computational tractography dMRI provides the first opportunity to measure white mat-  
24 ter and the properties of long-range connections in the living human brain. We will refer to these  
25 connections as “fascicles”, an anatomical term that refers to bundles of nerve or muscle. Mea-  
26 surements in living brains demonstrate the importance of white-matter for human behavior, health  
27 and disease (Fields, 2008a; Jbabdi et al., 2015; Johansen-Berg and Behrens, 2009) development  
28 (Lebel et al., 2012; Yeatman et al., 2014a) and learning (Bengtsson et al., 2005; Blumenfeld-Katzir  
29 et al., 2011; Hofstetter et al., 2013; Sagi et al., 2012; Sampaio-Baptista et al., 2013; Thomas and  
30 Baker, 2013). The white matter comprises a set of active fascicles that respond to human behav-  
31 ior, in health and disease by adapting their density, their shape, and their molecular composition  
32 and correspond to human cognitive, motor and perceptual abilities.

33 The visual white matter sustains visual function. In the primary visual pathways, action poten-  
34 tials travel from the retina via the optic nerve, partially cross at the optic chiasm, and continue via  
35 the optic tract to the lateral geniculate nucleus (LGN) of the thalamus. From the LGN, axons carry  
36 visual information laterally through the temporal lobe, forming the structure known as Meyer’s loop,  
37 and continue to the primary visual cortex (Figure 1). The length of axons from the retina to the  
38 LGN is approximately 5 cm long, while the length of the optic radiation from the anterior tip of  
39 Meyer’s loop to the calcarine sulcus is approximately 10 cm, with an approximate width of 2 cm at  
40 the lateral horn of the ventricles (Peltier et al., 2006; Sherbondy et al., 2008b). Despite traveling  
41 the entire length of the brain, responses to visual stimuli in cortex arise very rapidly (Maunsell  
42 and Gibson, 1992), owing to the high degree of myelination of the axons in the primary visual  
43 pathways. Healthy white matter is of crucial importance in these pathways, as fast and reliable  
44 communication of visual input is fundamental for healthy visual function

45 This review presents the state of the art in dMRI studies of the human visual system. We start  
46 with an introduction of the measurements and the analysis methods. Following that, we review  
47 three major applications of dMRI:

- 48 1. The delineation of the relationship between visual field maps and the white matter connections between the maps. This section focuses on a test-case of the connections between  
49 dorsal and ventral visual field maps.  
50
- 51 2. The effects of disorders of the visual system on the visual white matter. This section focuses  
52 on the changes that occur in the white matter in cases of peripheral and cortical blindness,  
53 and on white matter connectivity that underlies cross-modal plasticity and residual vision  
54 respectively in these cases.
- 55 3. The role that the visual white matter plays in visual discrimination of specific categories  
56 of visual objects. In particular, this section focuses on the white matter substrates of the  
57 perception of face stimuli.

58 Taken together, these three sections present multiple facets of dMRI research in vision science,  
59 covering a wide array of approaches and applications. They all demonstrate the ways in which  
60 studying the white matter leads to a more complete understanding of the biology of the visual  
61 system: its structure, response properties and relation to perception and behavior. In the summary  
62 of the review we will point out some common threads among these applications, point to a few of  
63 the challenges facing the field, and the promise of future developments to help address some of  
64 these challenges.

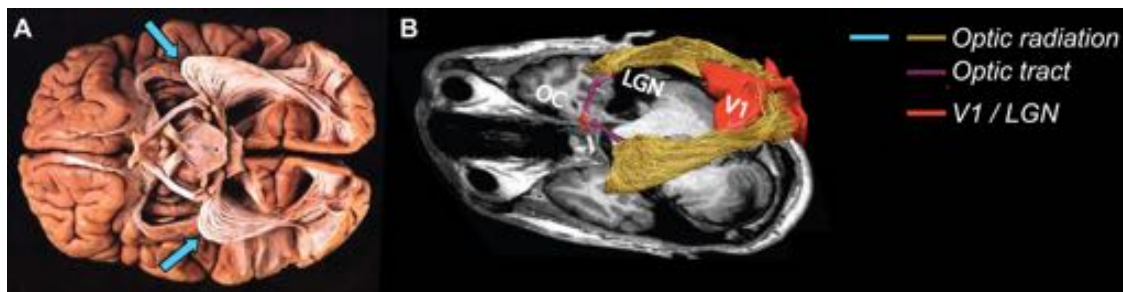

**Figure 1: Postmortem and in vivo study of the visual white matter.** **A.** Post mortem dissection of the optic radiation (OR), showing the Meyer's loop bilaterally (blue arrows; adapted from (Sherbondy et al., 2008b)). **B.** In vivo dissection of the optic radiation showing the optic chiasm (OC), Meyer's loop, the optic tract as well as both primary visual cortex (V1) and the lateral geniculate nucleus (LGN; (Ogawa et al., 2014))

## 65 **Methods for in-vivo study of the human white matter**

66 In this section, we introduce concepts and methods for measuring white matter connections using  
67 dMRI. The text is accompanied by a series of code examples implemented as Jupyter notebooks,  
68 which can be downloaded from <https://github.com/arokem/visual-white-matter>.

## 69 **Measuring white matter using diffusion magnetic resonance imaging**

70 Diffusion MRI measures the directional diffusion of water in different locations in the brain. In MRI,  
71 a strong magnetic field is applied to the brain, causing protons in water molecules to precess at a  
72 field-strength-dependent frequency. When the magnitude of the magnetic field is varied linearly in  
73 space (creating a magnetic field gradient), protons in different locations along the gradient begin

74 to precess at different rates. The rate of precession varies spatially along the same direction as  
75 the magnetic gradient. Diffusion MRI utilizes a second gradient pulse with the same magnitude  
76 but in the opposite direction that refocuses the signal by aligning the spins of water molecules.  
77 Refocusing will not be perfect for protons that have moved during the time interval between the  
78 gradient pulses, and the resulting loss of signal from dephasing is used to infer the mean diffusion  
79 of water molecules (due to random Brownian motion) along the direction of the magnetic gradi-  
80 ent. Measurements conducted with gradients applied along different axes sensitize the signal to  
81 diffusion in different directions (Figure 1B).

82 Additional magnetic field gradients are used to render the measurements spatially selective.  
83 In-vivo measurements in human typically use resolutions on the order of  $2 \times 2 \times 2 \text{ mm}^3$  (isotropic  
84 voxels). Using modern imaging techniques, such as multi-band imaging (Feinberg et al., 2010),  
85 high SNR measurements can be done in vivo with voxel sizes as small as  $1.25\text{-}1.5 \text{ mm}$  (isotropic)  
86 (Setsompop et al., 2013) using standard 3 Tesla (3T) hardware. Post-mortem and animal mea-  
87 surements can be done with much smaller size scale, down to approximately  $200 \mu\text{m}$  (isotropic)  
88 (Leuze et al., 2014; Reveley et al., 2015).

89 The sensitivity of the measurement to diffusion increases with the amplitude and duration of the  
90 magnetic field gradient, as well as with the time between the two gradient pulses (the *diffusion time*  
91 or *mixing time*). These three parameters are usually summarized in a single number: the b-value  
92 (see code example: <http://arokem.github.io/visual-white-matter/signal-formation>). In-  
93 creased diffusion-sensitivity does come at a cost: measurements at higher b-values also have  
94 lower SNR. In the typical dMRI experiment, diffusion times are on the order of  $50\text{-}100 \text{ msec}$ .  
95 Within this time-scale, at body temperature, water molecules may diffuse an average of approxi-  
96 mately  $20 \mu\text{m}$ , when no restriction is placed on their diffusion (at body temperature) (Le Bihan and  
97 lima, 2015). This rate of diffusion is found in the ventricles of the brain, for example. Within other  
98 brain structures the average diffusion distance is impeded by the brain tissue (Figure 1; see also:  
99 <http://arokem.github.io/visual-white-matter/dMRI-signals>).

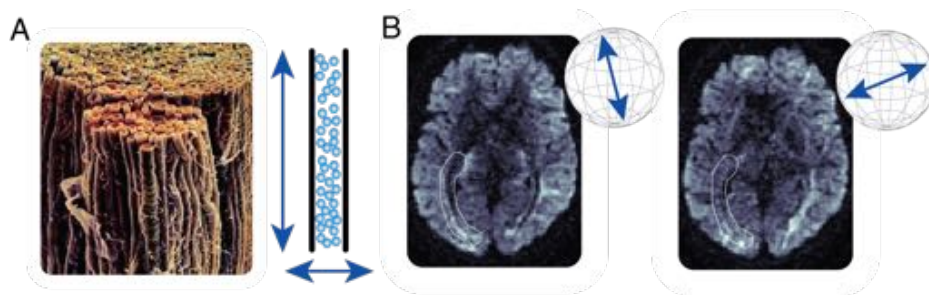

**Figure 2: Inferences about white matter from measurements of water diffusion.** **A** Micrograph of the human optic nerve. Left, bundles of myelinated axonal fascicles from the human optic nerve (image courtesy of Dr. George Bartzokis). Right, cartoon example of anisotropic water diffusion restriction by white matter fascicles. Water diffuses further along the direction of the “tube” (Pierpaoli and Basser, 1996). **B** Example of diffusion-weighted magnetic resonance measurements in a single slice of a living human brain. The same brain slice is shown as imaged with two different diffusion weighting directions. Diffusion weighting directions are shown by the inset arrows. The white highlighted area indicates the approximate location of part of the OR. The longitudinal shape of the OR appears as a local darkening of the MRI image when the diffusion weighting gradient is aligned with the direction of the myelinated fascicles within the OR, right-hand panel

100 In regions of the brain or body that contain primarily spherically-shaped cell bodies, water dif-  
101 fusion is equally restricted in all directions: it is isotropic. On the other hand, in fibrous biological  
102 structures, such as muscle or nerve fascicles, the diffusion of water is restricted across the fasci-  
103 cles (e.g. across axonal membranes) more than along the length of the fascicles (e.g. within the  
104 axoplasm). In these locations, diffusion is anisotropic. Measurements of isotropic and anisotropic  
105 diffusion can be used to estimate the microstructural properties of brain tissue and brain connec-  
106 tivity.

107 Inferring brain tissue properties and connectivity from dMRI data generally involves two stages:  
108 the first estimates the microstructure of the tissue locally in every voxel. The second stage con-  
109 nects local estimates across voxels to create a macrostructural model of the axonal pathways. We  
110 review approaches to these two stages in the sections that follow.

## 111 **Estimating brain microstructure: models of diffusion in single voxels**

112 Even though diffusion MRI samples the brain using voxels at millimeter resolution, the measure-  
113 ment is sensitive to diffusion of water within these voxels at the scale of  $\mu m$ . This makes dMRI a  
114 potent probe of the aggregate microstructure of the brain tissue in each voxel. A variety of analytic  
115 techniques and different models are routinely used to model tissue microstructure in brain voxel.  
116 We present two of the major approaches below.

### 117 **The diffusion tensor model**

118 The diffusion tensor model (DTM; (Basser et al., 1994a,b); see: <http://arokem.github.io/visual-white-matter/dtm>) approximates the directional profile of water diffusion in each voxel  
119 as a 3D Gaussian distribution. The direction in which this distribution has its largest variance is an  
120 estimate of the principal diffusion direction (PDD; Figure 3) – the direction of maximal diffusion. In  
121 many places in the brain, the PDD is aligned with the orientation of the main population of nerve  
122 fascicles and can be used as a cue for tractography (see below). In addition to the PDD, the dif-  
123 fusion tensor model provides other statistics of diffusion: the mean diffusivity (MD), which is an  
124 estimate of the average diffusivity in all directions, and the fractional anisotropy (FA), which is an  
125 estimate of the variance in diffusion in different direction (Pierpaoli and Basser, 1996) (Figure 3).  
126 These statistics are useful for characterizing the properties of white matter and numerous studies  
127 have shown that variance in these statistics within relevant white matter tracts can predict individ-  
128 ual differences in perception (Genç et al., 2011), behavioral and cognitive abilities (e.g. (Yeatman  
129 et al., 2011), and mental health (Thomason and Thompson, 2011). A major advantage of the  
130 DTM is that it can be estimated from relatively few measurement directions: accurate (Rokem  
131 et al., 2015) and reliable (Jones, 2004) estimates of the tensor parameters require measurements  
132 in approximately 30-40 directions, which requires approximately 10 minutes for a full-brain scan in  
133 a clinical scanner.  
134

135 The interpretation of tensor-derived statistics is not straight-forward. MD has been shown  
136 to be sensitive to the effects of stroke during its acute phases (Mukherjee, 2005), and loss of  
137 nerve fascicles due to Wallerian degeneration and demyelination also results in a decrease in FA  
138 (Beaulieu et al., 1996). These changes presumably occur because of the loss of density in brain  
139 tissue. The decrease in FA can be traced directly to the loss of myelin structure, which allows for  
140 more diffusion of extra-cellular water. But FA also decreases in voxels in which there are crossing  
141 fascicles (Pierpaoli and Basser, 1996; Frank, 2001, 2002), rendering changes in FA ambiguous. A  
142 recent study estimated that approximately 90% of the white matter contains crossings of multiple  
143 fascicles populations (Jeurissen et al., 2013). Therefore, it is unwarranted to infer purely from high

144 FA measures of myelination or in some individuals that these individuals have higher “white matter  
145 integrity” (Jones et al., 2013).

146 In an analogous issue, in voxels with crossing fascicles, the PDD will report the weighted av-  
147 erage of the individual fascicles directions, rather than the direction of any one of the fascicles  
148 (Rokem et al., 2015). These issues have led to increasing interest in models that represent mul-  
149 tiple fascicles within a voxel. Nevertheless, despite its limitations, the statistics derived from the  
150 diffusion tensor model provide useful information about tissue microstructure. This model has  
151 been so influential that “Diffusion Tensor Imaging” or “DTI” is often used as a synonym for dMRI.

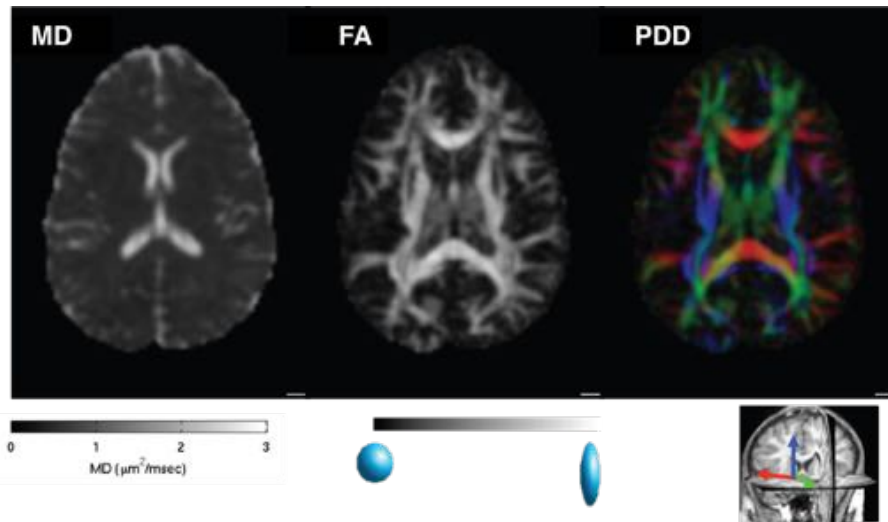

**Figure 3: Diffusion tensor imaging** The figure shows the three primary estimates of white matter organization derived from the diffusion tensor model measured in a single slice of a human brain (spatial resolution =  $2 \text{ mm}^3$ , b-value =  $900 \text{ s/mm}^2$ ). **Mean diffusivity**(MD, left) represents water diffusion averaged across all measured diffusion direction. The value is expected to be  $3 \mu\text{m}^2/\text{msec}$  for pure water (in body temperature) and indeed, MD is close to 3 in the ventricles. **Fractional anisotropy** (FA, middle) represents the variability of diffusion in different directions. This value is unit-less, and bounded between 0 and 1 and it is highest in voxels containing a single dense fascicle, such as in the corpus callosum. The **principal diffusion direction**(PDD, right) is the direction of maximal diffusion in each voxel. It is often coded with a mapping of the X,Y and Z components of the direction vector mapped to R,G and B color channels respectively, and scaled by FA. Main white matter structures such as the corpus callosum (red, along the right-to-left x axis) and the corticospinal tract (blue, along the superior-inferior y axis) are easily detected in these maps.

## 152 **Crossing fiber models**

153 One limitation of the diffusion tensor model that was recognized early on (Pierpaoli and Basser,  
154 1996) is that it can only represent a single principal direction of diffusion. Starting with the work of  
155 Larry Frank (Frank, 2001, 2002), there have been a series of models that approximate the dMRI  
156 signal in each voxel as a mixture combined from the signals associated with different fascicles  
157 within each voxel (Tournier et al., 2004; Behrens et al., 2007; Dell’Acqua et al., 2007; Tournier  
158 et al., 2007; Rokem et al., 2015)

159 (see code example: <http://arokem.github.io/visual-white-matter/SFM>). Common to all

160 these models is that they estimate a fascicle orientation distribution function (fODF), based on the  
161 partial volumes of the different fascicles contributing to the mixture of signals. These models are  
162 more accurate than the diffusion tensor model in regions of the brain where large populations of  
163 nerve fascicles are known to intersect, and also around the optic radiations (Figure 4) (Alexander  
164 et al., 2002; Rokem et al., 2015)

165 A second approach to modeling complex configurations of axons in a voxel are offered by  
166 so-called “model free” analysis methods, such as q-space imaging (Tuch, 2004) and diffusion  
167 spectrum imaging (DSI; (Wedeen et al., 2005)). These analysis methods estimate the distribution  
168 of orientations directly from the measurement, using the mathematical relationship between the  
169 dMRI measurement and the distribution of diffusion in different directions, and without interposing  
170 a model of the effect of individual fascicles and the combination of fascicles on the measurement.  
171 These approaches typically require a larger number of measurements in many diffusion directions  
172 and diffusion weightings (b-values), demanding a long measurement duration.

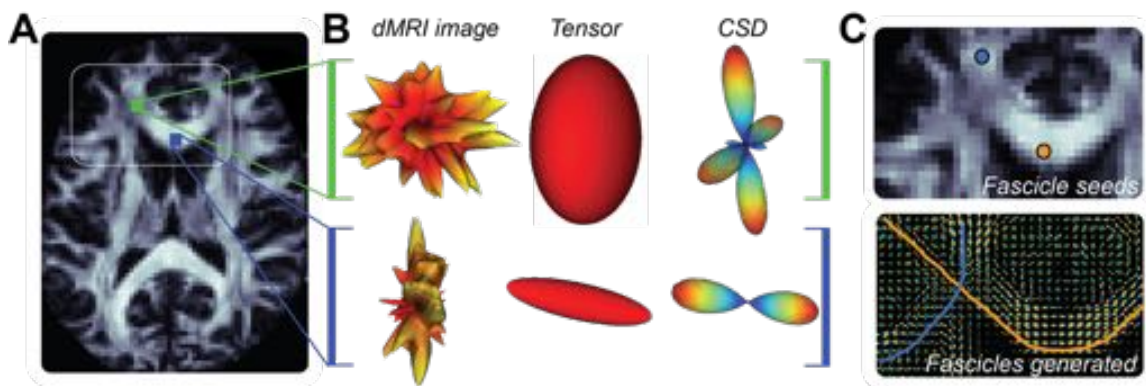

**Figure 4: Relation between diffusion MRI signals, voxel models of diffusion and tractography**  
**A** An axial brain slice. Two voxels locations are indicated in blue and green. The white rectangle indicates the location of the images in **C**. **B** Measured diffusion-weighted MR image in the colored locations in **A**. Left column. Diffusion signal for the green (top) and blue (bottom) locations rendered as 3D surfaces, with the color map indicating the intensity of the diffusion-weighted signal in each direction (red is low signal or high diffusion and yellow-white is high signal, or low diffusion). *Middle column*: The three-dimensional Gaussian distribution of diffusion distance, estimated from the DTM for the signal to the left. The major axis of the ellipsoid indicates the principal diffusion direction estimated by the tensor model, different for the two voxels. *Right column*: Fascicle orientation distribution function (fODF) estimated by a fascicle mixture model: the constrained spherical deconvolution (CSD) model (Tournier et al., 2007) from the signal to its left. CSD indicates several probable directions of fascicles. Colormap indicates likelihood of the presence of fascicles in a direction. **C** *Top panel*: Detail of the region highlighted in **A** (white frame) with example of two seeds randomly placed within the white matter and used to generate the fascicles in the bottom panel. *Bottom panel*: Fits of the CSD model to each voxel and two example tracks (streamlines) crossing at the location of the centrum semiovale.

173 **Estimating white matter macrostructure: methods for tracking long-range brain fas-**  
174 **cicles and connections.**

175 Computational tractography refers to a collection of methods designed to make inferences about  
176 the macroscopic structure of white matter pathways (Figure 5C; (Jbabdi et al., 2015): these al-



177 gorithms combine models of the local distribution of neuronal fascicles orientation across multi-  
178 ple voxels, to “track” long-range neuronal pathways. These pathways are generally interpreted  
179 as aggregated neuronal projections fascicles, rather than individual axons: brain “highways” that  
180 connect distal brain areas, that are millimeters to centimeters apart. Below we describe tractog-  
181 raphy by dividing it into three major phases of analysis: initiation, propagation, and termination of  
182 tracking.

### 183 **Track initiation**

184 The process of tractography generally starts by seeding a certain arbitrary number of fascicles  
185 within the white matter tissue identified by methods for tissue segmentation (Fischl, 2012). Track-  
186 ing is generally initiated in many locations within the white matter volume. In several cases, fasci-  
187 cles are seeded within spatially constrained regions of interest. This is the case when the goal is  
188 to identify brain connections by tracking between two specific brain areas (Smith et al., 2012).

### 189 **Track propagation**

190 Three major classes of algorithms are used to propagate tracks: deterministic, probabilistic and  
191 global. *Deterministic tractography* methods take the fascicles directions estimated in each voxel  
192 at face value and draw a streamline by following the principal fascicle directions identified by the  
193 voxel-wise model fODF (see above and [http://arokem.github.io/visual-white-matter/det\\_](http://arokem.github.io/visual-white-matter/det_track)  
194 [track](http://arokem.github.io/visual-white-matter/det_track)).

195 *Probabilistic tractography* methods (Conturo et al., 1999; Mori et al., 1999; Mori and Van Zijl,  
196 2002; Behrens et al., 2003, 2007; Tournier et al., 2012)) accept the voxel-wise estimate of the  
197 fODF, but recognize that such estimates may come with errors. Instead of strictly following the  
198 directions indicated by the fODF, they consider the fODF to be a probability distribution of possible  
199 tracking directions. These methods generate tracks aligned with the principal fiber directions,  
200 with higher probability, but they also generate tracks away from the principal directions with non-  
201 zero probability (code example: [http://arokem.github.io/visual-white-matter/prob\\_track](http://arokem.github.io/visual-white-matter/prob_track)).  
202 *Global tractography* methods build streamlines that conform to specified ‘global’ properties or  
203 heuristics (Mangin et al., 2013; Reisert et al., 2011). For example, some algorithms constrain  
204 streamlines to be spatially smooth (Aganj et al., 2011).

### 205 **Track termination**

206 Tractography is generally restricted to the white matter volume, so when tracks reach the end  
207 of the white matter they are terminated. To determine the extent of the white matter, we can  
208 rely on: methods of tissue segmentation based on anatomical measurements (Fischl, 2012) (see  
209 [http://arokem.github.io/visual-white-matter/det\\_track](http://arokem.github.io/visual-white-matter/det_track) for an example) or differences in  
210 diffusion properties between different tissue types. For example, because gray matter has low FA,  
211 tracking is often terminated when FA drops below a specific threshold (historically FA values of 0.2  
212 or 0.1 have been used as tracking stopping thresholds).

### 213 **The Fascicle Detection Problem**

214 Computational fascicle estimated using tractography should be considered as putative models of  
215 the structure of neuronal fascicles. Tractography can and does make mistakes and we are far  
216 from obtaining gold standard estimates of white matter anatomy and connections using these

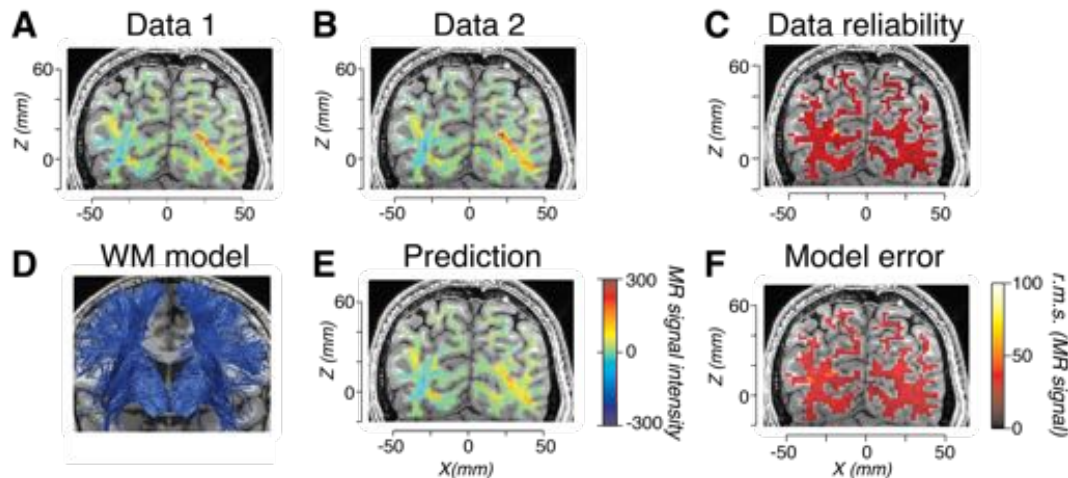

**Figure 5: Models of white matter anatomy and tractography evaluation.** **A** Measurement of a single diffusion direction shown on a coronal slice of a living human brain. **B**. Repeated measurement of the same direction in **A**, collected during the same scanning session, using the same scanner, sequence, and subject. **C** The reliability of the data, the root mean difference comparing Data 1 and 2 expressed by the color map. **D**. Portion of a full-brain connectome model, comprising part of the corona radiata. Fascicles estimated using Data 1 (**B**) and CSD-based probabilistic tractography. **E**. Predicted anisotropic diffusion from the model in **D**, diffusion direction shown is the same as in **A** and **B**. Diffusion prediction obtained using the linear fascicle evaluation method, LiFE (Pestilli et al., 2014). **F**. Connectome model accuracy. Root mean-squared error between Data 2 and the model prediction (**E**). Modified from (Pestilli et al., 2014).

217 computational methods. To date, we know that we can validly identify major white matter tracts  
218 (Wakana et al., 2007; Yeatman et al., 2012). Yet the fundamental and fine properties of the white  
219 matter anatomy are still unknown and matter of debate (for example see (Wedeen et al., 2012a;  
220 Catani et al., 2012; Wedeen et al., 2012b)). There is a difficulty in the field in the ability to validate  
221 white matter models. Ideally, tractography would be validated routinely in each individual (on a  
222 case-by-case basis; Pestilli et al. (2014); Pestilli and Franco (2015)). In the absence of the needed  
223 methods several approaches have been proposed to tractography validation.

224 Post-mortem validation methods have been proposed to show the degree to which tractogra-  
225 phy can and cannot identify connections found by tracing and histological methods. Unfortunately,  
226 such approach cannot contribute to in-vivo understanding of brain function and disease progres-  
227 sion. Furthermore, even if multiple brains were to be available for direct inspection with histological  
228 and anatomical methods, validation would be difficult as histological validation methods have their  
229 own limitations (Goga and Türe, 2015; Simmons and Swanson, 2009; Bastiani and Roebroek,  
230 2015). Thus, while the ability of most methods to identify major tracts has been validated, it re-  
231 mains difficult to determine whether estimates of tract differences within groups or individuals as  
232 measured using dMRI genuinely and accurately correspond to anatomical differences. This has  
233 led to interest in more direct methods of validation, such as validation with phantoms of known  
234 structure or with simulations (Côté et al., 2013).

235 Recently, methods that directly estimate the error of a tracking method with respect to the MRI  
236 data have been proposed (Daducci et al., 2015; Pestilli et al., 2014; Sherbondy et al., 2008a; Smith  
237 et al., 2015). These methods all rely on a forward model approach: the estimated tracts are used  
238 to generate a synthetic version of the measured diffusion signal and to compute the tractogra-

239 phy model error, by evaluating whether the synthetic and measured data match each other (Fig-  
240 ure 5; code example: <http://arokem.github.io/visual-white-matter/fascicle-evaluation>).  
241 These methods allow evaluation of tractography but not necessarily validation of the anatomy of  
242 the final results (Daducci et al., 2016).

243 Relating tractography estimates to brain structures can be conceptualized within the estab-  
244 lished signal detection theory framework (Green and Swets, 1966). The primary goal of tractogra-  
245 phy is to detect white matter fascicles and connections. Figure 6 shows the conceptualization of  
246 tractography as a signal detection process: every time we track in a brain, there are three potential  
247 outcomes of the process; it can identify incorrect fascicles (false alarm), it can miss real fascicles  
248 (miss) or it can identify correct white matter fascicles (hits). We call this the *fascicle detection*  
249 *problem* or FDP.

250 Deterministic and probabilistic methods introduced above, use different criteria for the FDP.  
251 Deterministic tractography uses a conservative criteria, where it is assumed that each voxel con-  
252 tains only one or few fascicles. The false alarm rate is lower but the miss rate is also higher. The  
253 hit rate may also be low, if the fODF used in each voxel does not properly describe the biology of  
254 the white matter. Probabilistic tractography uses a more liberal criterion because fascicles can be  
255 created using the full extent of the fODF in each voxel. These methods create a higher number of  
256 false alarms, but are also more likely to generate hit fascicles (i.e., identify existing fascicles; see  
257 also Cote et al. (Côté et al., 2013) for a classification of tractography errors). Global tractography  
258 methods lie somewhere between deterministic and probabilistic methods. Their position in the  
259 continuum between the very conservative deterministic methods and the very liberal probabilistic  
260 methods depends on the details of the global tractography algorithm.

261 The process of fascicle detection is akin to signal interpretation processes in many other sci-  
262 entific fields where data resolution and signal-to-noise ratio (SNR) limit what can be measured  
263 and where methods for data analysis limit how well the signals in the data can be exploited to  
264 make inferences. Diffusion data resolution (both angular, the number of diffusion directions mea-  
265 sured and spatial resolution, the size of the voxels) and tractography methods (probabilistic vs.  
266 deterministic, for example) can change the configuration of fascicles that can be detected. Major  
267 white matter tracts can be detected using lower-resolution data. Smaller fascicles might require  
268 higher resolution data (Vu et al., 2015). For example, because the the white matter around vi-  
269 sual cortex is thin and convoluted, lower resolution dMRI data fails to provide information about  
270 connections between the two (dorsal and ventral) banks of the calcarine sulcus. Changing the  
271 spatial resolution of the data (e.g., by using a ultra high-field scanner) allows the same tractogra-  
272 phy methods to find connections between the dorsal and ventral calcarine sulcus (Figure 6B). At  
273 the same time, for a given data-set (with its spatial and angular resolution, and SNR) changing  
274 tractography methods can change the white matter pathways that are identified. For example,  
275 Fig. 6C (left) shows how a “u-fiber” system connecting between human dorsal V3A and V3 can  
276 be missed when a conservative curvature parameter is used in probabilistic tractography. Chang-  
277 ing the parameters of curvature allows detection of short “u-fibers”, such as the one in Fig. 6C  
278 (right). Changing the resolution of the data (number of measured diffusion directions or spatial  
279 resolution) is akin to changing  $d'$  (Fig. 6A): increased data resolution improves the sensitivity of  
280 the diffusion data, disambiguating signals generated by complex fascicle configurations. Changes  
281 in tractography method or parameters may reduce the missed fascicles or the false alarms, but it  
282 does not speak to increased sensitivity in detection of white matter pathways. The dilemma is that  
283 the best analysis method is likely to depend on the properties of the data as well as the fascicle to  
284 be estimated.

285 A recently-proposed procedure combines the best characteristics of fascicles generated by  
286 multiple tractography algorithms (Takemura et al., 2016). The method, called Ensemble Trac-

287 tractography, generates multiple tractography solutions, based on different tractography algorithms.  
 288 Fascicle evaluation (Pestilli et al., 2014) is then used to arbitrate between the different solutions  
 289 provided by the different algorithm settings, allowing the method to capitalize on several different  
 290 levels of sensitivity, while maintaining an accurate representation of the measured signal. Figure  
 291 6C shows that this method identifies complex fascicles configurations, easily missed by a single  
 292 tractography method.

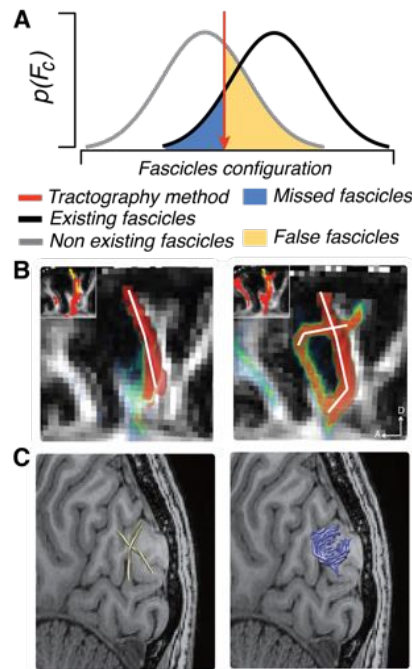

**Figure 6: Identifying white matter tract and the signal detection process.** **A** The process of tractography described using Signal Detection Theory. The brain contains a certain number of true fascicles (black). The resolution of the diffusion data (either spatial or directional resolution) can provide ambiguous signals indicating fascicles configurations for both existing (black) and non-existing fascicles configurations (gray). Tracking algorithms allow identifying some existing fascicles (right-hand side of the red criterion line), but can miss others (blue highlight), and sometimes can track non-existing fascicles (yellow). **B**. Example of increasing sensitivity for detecting complex fascicles configurations. Left, lower resolution data ( $1.25 \text{ mm}^3$ ). Right, higher resolution data ( $0.7 \text{ mm}^3$ ). Increasing data resolution improves fascicles detection. This process is akin to changing  $d'$  in the distributions in **A**. **C** Given a fixed data resolution ( $1.5 \text{ mm}^3$  in the example); (Takemura et al., 2016)) changing tractography methods can allow detecting more fascicles, this is akin to a change in criterion in **A**. In the figure whereas using a conservative turning radius (2 mm) for the streamlines being generated does not allow capturing short-range u-fiber systems (green), using more liberal turning radius (0.5 mm) allows capturing fine details of the anatomy such as short range u-fibers (blue)

### 293 **Comparing tracks and connections across individuals**

294 Once white matter tracts and brain connections have been identified using tractography these  
 295 estimates have traditionally been analyzed in three ways:

- 296 1. Identify major white matter pathways (Catani and Thiebaut de Schotten, 2008; Catani et al.,  
297 2002). One typical step after tractography is to cluster these curves together into groups  
298 (Garyfallidis et al., 2012; Wassermann et al., 2010) align these curves to each other, either  
299 across different individuals, or across hemispheres (Garyfallidis et al., 2015), or to standard  
300 anatomical landmarks (Wakana et al., 2007; Yeatman et al., 2012; Yendiki et al., 2011).  
301 For example, the optic radiation (Kammen et al., 2015; Sherbondy et al., 2008b) and other  
302 connections between thalamus and visual cortex (Ajina et al., 2015; Allen et al., 2015) can  
303 systematically be identified in different individuals based on their end-points.
- 304 2. Estimate micros-structural tissue properties (such as FA and MD) within white matter tracts  
305 (Yeatman et al., 2012; Yendiki et al., 2011) (see Figure 7 A and B).
- 306 3. Estimate connectivity between different regions of the cortex (Jbabdi et al., 2015; Rubinov  
307 et al., 2009)(See Figure 7C).

308 All these estimates are combined across individuals and either groups of individuals are compared  
309 for statistical significance (for examples by comparing patient groups to control groups) or the  
310 estimates are correlated with phenotypic properties and behavior to find correlations between  
311 white matter properties and other aspects of human health and behavior of interest. Below we  
312 present multiple cases of how such group analyses have been applied to study visual function.

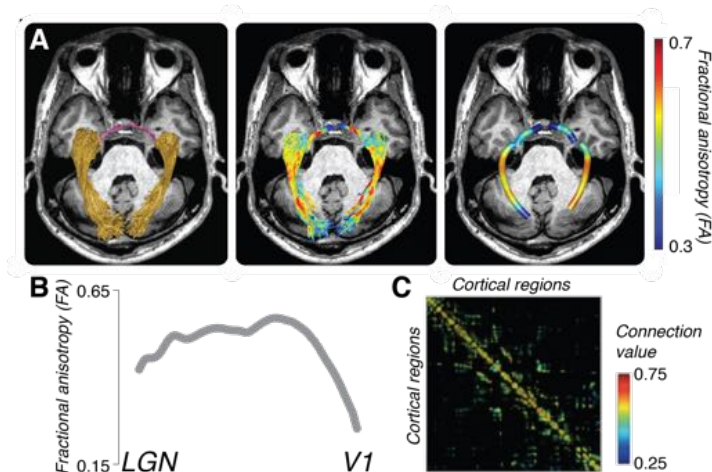

**Figure 7: Example applications of tractography to study brain connections and white matter**  
**A** Estimates of the optic radiation (OR; left panel gold) and tract (OT; left panel, magenta) from probabilistic tractography (Ogawa et al., 2014). Estimates of fractional anisotropy (FA) projected on top of the anatomy of the OR and OT (right panel). **B** Measurement of FA averaged across the length of the left optic radiation in A. **C**. Matrix of connections between several cortical brain areas. The connection value in each cell of the matrix was derived by normalizing the number of fascicles touching two regions (Sporns, 2013).

## 313 2 Tracts and connections across human visual maps

314 The spatial arrangement of retinal inputs is maintained in visual cortex; signals from nearby loca-  
315 tions in the retina project to nearby locations in cortex (Henschen, 1893; Holmes and Lister,

316 1916; Inouye, 1909; Wandell et al., 2007; Wandell and Winawer, 2011). Vision scientists routinely  
317 use functional magnetic resonance imaging (fMRI) to identify these visual field maps (Engel et al.,  
318 1994; DeYoe et al., 1994; Sereno et al., 1995; Dumoulin and Wandell, 2008), and more than 20  
319 maps have been identified to date (Smith et al., 1998; Press et al., 2001; Brewer et al., 2005; Lars-  
320 son and Heeger, 2006; Amano et al., 2009; Arcaro et al., 2009; Silver and Kastner, 2009; Wandell  
321 and Winawer, 2011). Recent advances in dMRI and tractography are opening new avenues to  
322 study connections between visual field maps through the white matter in living brains. This section  
323 introduces what we can learn from relating visual field maps with the endpoints of the white matter  
324 pathways.

## 325 **Segregation, clustering and hierarchy in visual field maps**

326 The functional organization of the visual field maps in humans and animal models has been identi-  
327 fied by convergent knowledge from fMRI, neuropsychological and cytoarchitectonic studies (Wan-  
328 dell et al., 2007; Wandell and Winawer, 2011; Vanduffel et al., 2014; Kolster et al., 2014). We  
329 propose three organizational principles for the architecture of the visual field maps to summa-  
330 rize findings in the literature: segregation, clustering and hierarchy. The first principle proposes  
331 that visual maps have some degree of functional specialization. This is a soft principle because  
332 many areas deal with multiple aspects of the visual stimulus, but some areas respond with more  
333 stimulus specificity than others (e.g. motion selectivity in macaque MT and human MT+; (Dubner  
334 and Zeki, 1971; Movshon et al., 1985; Watson et al., 1993; Tootell et al., 1995; Huk and Heeger,  
335 2002). There is a classic proposal that functional segregation might extend beyond single visual  
336 maps. It has been proposed that visual field maps can be grouped into a dorsal and a ven-  
337 tral stream (Ungerleider and Mishkin, 1982; Ungerleider and Haxby, 1994; Milner and Goodale,  
338 1995). According to this model, the dorsal stream engages in spatial processing and action guid-  
339 ance, whereas the ventral stream engages in analyzing colors and forms. The second principle  
340 organizes visual field maps into clusters which share common eccentricity maps (Wandell et al.,  
341 2007; Kolster et al., 2014, 2009) and are distinguished by their angular representations. The third  
342 principle identifies a hierarchy of visual field maps (Felleman and Van Essen, 1991) based on the  
343 input and output layer projections. The first and third principles were defined mostly based on  
344 tracer injections, neurophysiological measurements and cytoarchitecture in the macaque brain.  
345 The second principle was discovered using functional MRI which has a large field of view and thus  
346 can visualize large-scale topological organization of visual field maps.

347 Functional segregation, clustering and hierarchy are likely to be established by both cortical  
348 neuronal sensitivity properties and the connectivity of neurons communicating across different  
349 maps. To date, the full anatomical structure of connections of the human visual cortex has not  
350 been characterized. This structure is likely to differ between macaque and human brain because  
351 the visual field map organization and cortical mantle anatomy differ between the two species in  
352 several ways (Vanduffel et al., 2014; Wandell and Winawer, 2011).

353 Understanding the network of communication pathways in the human brain is fundamental to  
354 understanding visual function in health and disease. Building a model of the communication archi-  
355 tecture will also help with both prognosis and intervention, this is because vision is a sense that  
356 integrates information across many visual features (Huk and Heeger, 2002). For example, skilled  
357 reading requires the integration of information across visual space, spatial attention, eye move-  
358 ments, as well as word recognition (Vidyasagar and Pammer, 2010). In fact, there is converging  
359 evidence showing the possibility of communication between dorsal and ventral streams (Fang and  
360 He, 2005; Grill-Spector et al., 1998, 2000; James et al., 2002; Konen and Kastner, 2008), although  
361 the anatomy of white matter pathway communicating these maps clusters was not well understood

362 until very recent reports (see below).

### 363 **Relating structure to function: Combining fMRI and diffusion MRI to identify the** 364 **tracts communicating between maps**

365 There are several examples combining fMRI and dMRI to clarify the relationship between the white  
366 matter tracts and visual field maps. Dougherty and colleagues analyzed the relationship between  
367 the visual field maps and corpus callosum fascicles (Dougherty et al., 2005). This analysis was  
368 extended to measure the properties of this pathway in relation to reading (Dougherty et al., 2007)  
369 and blindness (Saenz and Fine, 2010; Bock et al., 2013). Kim and colleagues explored white  
370 matter pathways between early visual cortex and category selective regions by combining fMRI,  
371 dMRI and fiber tractography (Kim et al., 2006). Greenberg and colleagues identified the visual  
372 field maps in intraparietal sulcus using fMRI (Silver and Kastner, 2009) and analyzed the tracts  
373 communicating IPS maps and early visual field maps (Greenberg et al., 2012). There are studies  
374 attempting to identify the pathway between subcortical nuclei (LGN or Pulvinar) and cortical maps  
375 (Ajina et al., 2015; Alvarez et al., 2015; Arcaro et al., 2015).

### 376 **Validating novel tracts**

377 Whereas these approaches provide novel insight on the relationship between white matter path-  
378 way and functionally-defined cortical maps, a statistical evaluation can clarify how much the white  
379 matter connection between maps are supported by dMRI data increasing the confidence in visual  
380 white matter organization identified by dMRI. Pestilli and colleagues developed a method in which  
381 the evidence in support of a fascicle of interest is quantified by comparing model accuracy with  
382 and without the fascicle (Pestilli et al., 2014). This analysis is used to evaluate the statistical evi-  
383 dence for relatively unstudied pathways, including pathways between visual areas (Gomez et al.,  
384 2015; Leong et al., 2016; Takemura et al., 2015).

385 We used this approach to study the Vertical Occipital Fasciculus (VOF). The VOF, which con-  
386 nects dorsal and ventral visual field maps, was known to 19th century anatomists from post-  
387 mortem studies (Wernicke, 1881; Sachs, 1892; Déjerine, 1895), but it was widely ignored in the vi-  
388 sion literature until recent studies primarily using dMRI (Yeatman et al., 2013; Martino and Garcia-  
389 Porrero, 2013; Yeatman et al., 2014b; Takemura et al., 2015; Duan et al., 2015; Weiner et al.,  
390 2016). By combining fMRI and dMRI it is possible to visualize the VOF endpoints near the visual  
391 field maps (Takemura et al., 2015).

392 Figure 8C describes the endpoints of the VOF overlaid on the cortical surface together with  
393 visual field map boundary identified in Figure 8A. We plotted the position of grey matter nearby the  
394 tract endpoints in color maps on cortical surface. The dorsal endpoints of the VOF are near V3A,  
395 V3B and neighboring maps (Figure 8C; (Takemura et al., 2015)). The ventral endpoints of the VOF  
396 are near hV4 and VO-1. This is important because it sheds light on the nature of communication  
397 through the VOF: hV4 and VO-1 are the first full hemifield maps in the ventral stream (Wade et al.,  
398 2002; Brewer et al., 2005; Arcaro et al., 2009; Winawer and Witthoft, 2015; Winawer et al., 2010),  
399 while V3A and V3B are the first visual field maps to contain a full hemifield representation in the  
400 dorsal stream. V3A and V3B also have an independent foveal cluster (Smith et al., 1998; Press  
401 et al., 2001) and respond selectively to motion and to disparity (Tootell et al., 1997; Backus et al.,  
402 2001; Tsao et al., 2003; Nishida et al., 2003; Ashida et al., 2007; Cottureau et al., 2011; Fischer  
403 et al., 2012; Goncalves et al., 2015).

404 We note that there are some limitations to associating “tract endpoints” in tractography and  
405 cortical projections in gray matter. In practice, tractography is usually terminated at the boundary

406 between gray and white matter, because standard dMRI measurements fall under the resolution  
407 required to accurately delineate the complex tissue organization within gray matter. Therefore,  
408 there is uncertainty in relating tract endpoints to the cortical surface. This uncertainty is com-  
409 pounded by the dispersion of axons in gray matter, and by U-fiber system in superficial white  
410 matter which impedes accurate estimation of tract endpoints (Reveley et al., 2015). Thus, the  
411 analysis will give us the information on the spatial proximity between tract endpoint and cortical  
412 maps, but does not provide us a definitive estimate on the cortical projection of the tract. We  
413 may expect the improvement of the quality of this analysis by utilizing the modelling of complex  
414 fiber organization from diffusion MRI data, improving data resolution (Sotiropoulos et al., 2013) or  
415 improved tractography methods (Reisert et al., 2011; Takemura et al., 2016; Wandell, 2016).

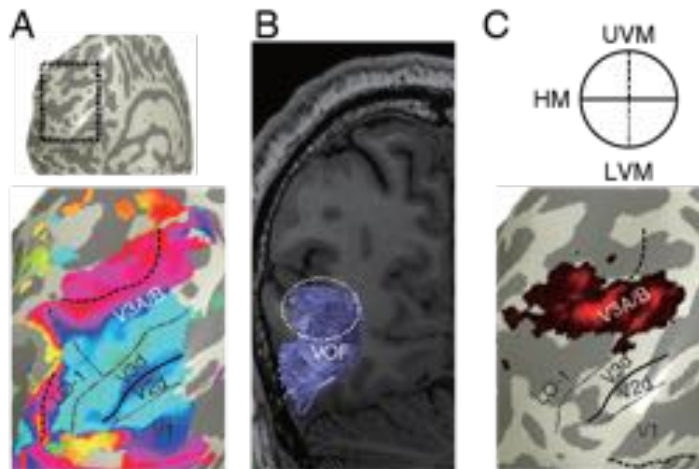

**Figure 8: Relation between cortical visual field maps and tract endpoints.** **A** Visual field maps identified by fMRI. The surface of dorsal visual cortex was extracted (dotted box in top panel) and enlarged (bottom panel). Colors on the bottom panels describes polar angle representation in population receptive field maps (Dumoulin and Wandell, 2008) red: upper vertical meridian, blue: horizontal, green: lower vertical meridian). The boundaries between visual field maps are defined as polar angle reversals in population receptive field maps. **B** The VOF identified in an identical subject using dMRI and fiber tractography. Reproduced from (Takemura et al., 2015) with permission. **C** Overlay between visual field maps and VOF projections. Color maps indicate voxels near the VOF endpoints in this hemisphere, and the color scale indicates the density of fascicle endpoints. The borders of visual field maps (solid and dotted lines; upper panel depicts the representation of horizontal and vertical meridians) were adopted from fMRI-based mapping (**A**).



### 416 **3 Relationship between the visual white-matter and visual impair-** 417 **ment**

418 One of the motivations for studying the effects of blindness on white matter, is that our extensive  
419 understanding of the anatomical and functional structure of the visual system, both in visually  
420 normal and in visually deprived animals, provides a good model system in which to evaluate  
421 current methods for measuring white matter structure in vivo. Indeed since the classic studies  
422 of Hubel and Wiesel in the 1960s (Wiesel and Hubel, 1963, 1965b,a; Wiesel et al., 1963), visual  
423 deprivation has been an important model for examining the effects of early experience on brain  
424 development and function. In this section, we focus on the effects of visual loss, due to peripheral  
425 blindness (such as retinal disease), on white matter pathways. In addition, we discuss how in vivo  
426 measurements of white matter structure can provide insight into pathways that mediate blindsight  
427 after striate lesions. Blindsight provides a particularly elegant example of determining which of  
428 multiple candidate pathways are likely to mediate residual behavioral performance based on in  
429 vivo measurements of white matter structure.

#### 430 **White matter changes due to peripheral blindness**

431 Visual deprivation resulting from loss of input from the eye provides an excellent model for under-  
432 standing the links between structure and function, as the brain itself remains largely intact. A wide  
433 variety of studies in both animals and humans have demonstrated large scale functional (Lewis  
434 and Fine, 2011), neuroanatomical (Bock and Fine, 2014; Movshon and Van Sluyters, 1981), neu-  
435 rochemical (Coullon et al., 2015; Weaver et al., 2013) and even vascular (De Volder et al., 1997;  
436 Uhl et al., 1993) changes within occipital cortex as a result of early blindness. Given this extensive  
437 animal and human literature, peripheral blindness provides a particularly good model system to  
438 examine the reliability and sensitivity of current noninvasive methods for assessing the effects of  
439 experience on white matter pathways. Here, we review the white matter changes associated with  
440 visual deprivation, paying particular attention to the links between white matter microstructure and  
441 alterations of functional responses due to visual loss.

#### 442 **The optic tract and optic radiations**

443 Early or congenital blindness results in severe degradation of the optic tract (between the eye and  
444 the lateral geniculate nucleus) and the optic radiations (between the lateral geniculate nucleus  
445 and V1). Not only are these pathways noticeably reduced in volume, but there is also decreased  
446 longitudinal and increased radial diffusivity within these tracts (Noppeney et al., 2005; Ptito et al.,  
447 2008; Reislev et al., 2015; Shu et al., 2009) suggesting degradation of white matter microstructure  
448 within the remaining tract. These effects seem to be particularly pronounced in anophthalmic  
449 individuals, suggesting that retinal signals play a role in the development of these tracts (Bridge  
450 et al., 2009).

451 Reductions in fractional anisotropy (FA) within the optic tract and optic radiations are also found  
452 in individuals who become blind in adolescence or adulthood (Dietrich et al., 2015; Shimony et al.,  
453 2006; Wang et al., 2013). There is some suggestion that the microstructure of these tracts may be  
454 more heavily degraded in individuals with acquired blindness than in congenitally blind individuals,  
455 though in some part these results may be due to the etiologies of later blindness - for example  
456 glaucoma is capable of causing physical damage to the optic tract.

## 457 **Callosal connectivity**

458 Despite numerous studies, the effects of early visual deprivation on the posterior callosal fibers  
459 within the splenium (connecting the occipital lobes) are not yet fully understood. Several studies  
460 (Leporé et al., 2010; Ptito et al., 2008; Tomaiuolo et al., 2014) have reported that the posterior  
461 part of the corpus callosum is reduced in volume. However, Bock et al. (2013) failed to find any  
462 indication of reduced volume in the portion of the splenium containing fibers connecting V1/V2 in  
463 either early blind or anophthalmic individuals (Bock et al., 2013). In the Bock et al. study, the only  
464 evidence of callosal atrophy due to visual loss was a slight reduction in FA within the splenium in  
465 anophthalmic individuals. Given the magnitude of the effect found by Tomaiuolo et al., the Bock  
466 study may have been underpowered, though there was no indication of a non-significant difference  
467 between groups. An alternative possibility is that the significant methodological differences across  
468 the studies may explain the discrepancy in results. Most of the studies listed above registered  
469 individual data to a template, with some studies then anatomically segmenting the callosum into  
470 sub-regions of various sizes. In contrast, Bock et al. defined the splenium in a midline sagittal slice  
471 using fibers tracked from a surface based ROI, in which V1/V2 was identified based on cortical  
472 folding for each subject – resulting in a much more restrictive definition of the splenium. Indeed,  
473 the splenial region of interest in the Bock et al. (2013) study was roughly a third of the area defined  
474 by Tomaiuolo et al. (Tomaiuolo et al., 2014). Thus, one possible explanation for these differing  
475 findings is that the callosal fibers that connect V1/V2 are less affected by visual deprivation than  
476 those representing higher-level cortical areas.

477 As well as examining the volume of the splenium, Bock et al. (2013) also showed that the topo-  
478 graphic organization of occipital fibers within the splenium is maintained in early blindness. Even  
479 within anophthalmic individuals, it was possible to observe a ventral-to-dorsal mapping within  
480 the splenium with fibers from ventral V1-V3 (representing the upper visual field) projecting to the  
481 inferior-anterior corner of the splenium and fibers from dorsal V1-V3 (representing the lower visual  
482 field) projecting to the superior-posterior end. Similarly, it was possible to observe an eccentricity  
483 gradient of projections from foveal-to peripheral V1 subregions running in the anterior-superior to  
484 posterior-inferior direction, orthogonal to the dorsal-ventral mapping (Bock et al., 2013).

## 485 **Cortico-cortical connections**

486 Over the last two decades a considerable number of studies have observed functional cross-modal  
487 plasticity (novel or augmented responses to auditory or tactile stimuli within occipital cortex) as a  
488 result of congenital blindness. Specifically, occipital regions have been shown to demonstrate  
489 functional responses to a variety of auditory (Röder et al., 1999; Lessard et al., 1998; Voss et al.,  
490 2004; Gougoux et al., 2004; Jiang et al., 2014), language (Sadato et al., 1996; Cohen et al.,  
491 1997; Röder et al., 2002; Burton et al., 2003; Bedny et al., 2011; Watkins et al., 2012) and tactile  
492 (Alary et al., 2009; Goldreich and Kanics, 2003; Van Boven et al., 2000) stimuli. One of the more  
493 attractive explanations for these cross-modal responses, given the animal literature (Innocenti  
494 and Price, 2005; Restrepo et al., 2003; Webster et al., 1991), is that they might be mediated  
495 by altered white matter connectivity – for example a reduction in experience-dependent pruning.  
496 As a result, when methods for measuring white matter tracts in vivo became available there was  
497 immediate interest in looking for evidence of novel and/or enhanced connections within early blind  
498 individuals. However, despite the massive changes in functional responses within occipital cortex  
499 that are observed as a result of blindness, cortico-cortico white matter changes as a result of  
500 early blindness are not particularly dramatic, with little or no evidence for enhanced connectivity  
501 as predicted by the 'reduced pruning' hypothesis.

502 Indeed, reduced fractional anisotropy is consistently found within white matter connecting the  
503 occipital and temporal lobes (Bridge et al., 2009; Ptito et al., 2008; Reislev et al., 2015; Shu et al.,  
504 2009). This finding is somewhat puzzling given that several studies have shown that language  
505 stimuli activate both the lateral occipital cortex and fusiform regions in congenitally blind individuals  
506 (Bedny et al., 2011; Watkins et al., 2012). Similarly, no increase in FA has been detected in the  
507 pathways between occipital and superior frontal cortex, a network that has shown to be activated  
508 by language in congenitally blind populations (Bedny et al., 2011; Watkins et al., 2012) (Bedny  
509 et al., 2011; Watkins et al., 2012). Indeed two studies have found evidence of deterioration (e.g.  
510 reduced FA) within the inferior fronto-occipital fasciculus (Reislev et al., 2015; Shu et al., 2009).

511 It is not clear what causes the lack of consistency in the studies described above. One likely  
512 factor is between-subject variability. Estimates of individual differences in tracts suggest that  
513 between-group differences require surprisingly large subject numbers even for relatively large and  
514 consistently located tracts. For example, within the inferior and superior longitudinal fasciculus, to  
515 detect a 5% difference in fractional anisotropy at 0.9 power would require 12-19 subjects/group in  
516 a between-subject design (Veenith et al., 2013). Because of the difficulty of recruiting blind sub-  
517 jects with relatively homogenous visual histories, many of the studies cited above used moderate  
518 numbers of subjects.

519 One of the more puzzling findings described above is the consistent finding of reduced white  
520 connectivity between occipital and temporal lobes and between occipital and superior frontal lobes,  
521 given that occipital cortex shows enhanced responses to language as a result of blindness. One  
522 possibility is that measured connectivity provides a misleading picture of actual connectivity be-  
523 tween these regions. One potential confound is the effect of crossing fibers. If blindness leads to a  
524 loss of pruning that extends beyond these major tracts then the resulting increase in the prevalence  
525 of crossing fibers within other networks might reduce measurable FA within occipito-temporal and  
526 occipito-frontal tracts.

527 Alternatively, it is possible that the enhanced language responses found in occipital cortex  
528 genuinely co-exist with reduced connectivity with temporal cortex. For example, we have re-  
529 cently suggested that an alternative perspective in understanding cortical plasticity as a result  
530 of early blindness is to consider that occipital cortex may compete rather than collaborate with  
531 non-deprived regions of cortex for functional role (Bock and Fine, 2014). According to such a  
532 model, lateral occipital cortex may compete with temporal areas, with language tasks assigned  
533 to the two regions in such a way as to maximize the decoupling between the areas. In the con-  
534 text of such a framework, reductions in anatomical connectivity between the two areas are less  
535 surprising.

## 536 **Early vs. late blindness**

537 Reductions in fractional anisotropy (FA) within the optic tract and optic radiations are also found in  
538 individuals who become blind in adolescence or adulthood (Dietrich et al., 2015; Shimony et al.,  
539 2006; Wang et al., 2013), suggesting that visual input is necessary for maintenance as well as  
540 development of these tracts. Indeed, there is some suggestion that the microstructure of these  
541 tracts may be more heavily degraded in individuals with acquired blindness than in congenitally  
542 blind individuals, though in some part these results may be due to the etiologies of later blindness  
543 - for example glaucoma is capable of causing physical damage to the optic tract.

544 The effects of early vs. late blindness on cortico-cortico white matter connections remains  
545 unclear. One study has found that reductions in FA may be more widespread in late acquired  
546 blindness compared to congenital blindness, with late blind individuals showing reduced FA in  
547 the corpus callosum, anterior thalamic radiations, and frontal and parietal white matter regions

548 (Wang et al., 2013). Such a result is quite surprising, though it is possible that the cross-modal  
549 plasticity that occurs in early blind individuals might prevent deterioration within these tracts, and  
550 this 'protective' effect does not occur in late blind individuals. However this difference between  
551 late and early blind subject groups was not replicated by Reislev et al. (Reislev et al., 2015) who  
552 noted similar losses in FA for early and late blind subjects within both the inferior longitudinal  
553 fasciculus and the inferior fronto-occipital fasciculus using a tract-based approach. (This group  
554 did find that significant increases in radial diffusivity within late blind subjects relative to sighted  
555 control subjects, but did not directly compare radial diffusivity between late and early blind subject  
556 groups.)

## 557 **White matter changes due to cortical blindness**

558 Damage to the primary visual cortex (V1) causes the loss of vision in the contralateral visual  
559 field (homonymous hemianopia), which in turn leads to degeneration of the geniculo-striate tract.  
560 Despite these lesions and a lack of conscious vision, many people can still correctly detect the  
561 presence/absence of a stimulus (Poppel et al., 1973), as well as discriminate between varia-  
562 tions in stimulus color and motion, (Ffytche et al., 1996; Morland et al., 1999) despite a lack of  
563 conscious awareness of the stimulus – a condition known as 'blindsight' (Poppel et al., 1973;  
564 Weiskrantz et al., 1974). Given the absence of the major geniculo-striate projection, any residual  
565 visual information is likely to be conveyed by an intact projection from subcortical visual regions to  
566 undamaged visual cortex.

567 While several individual case studies have examined the white matter pathways underlying  
568 residual vision (Bridge et al., 2010, 2008; Leh et al., 2006; Tamietto et al., 2012), a critical test  
569 of the functional relevance of white matter microstructure was recently carried out by comparing  
570 individuals with V1 lesions who did and did not demonstrate residual 'blindsight' vision. Ajina et al.  
571 (2015) examined white matter microstructure within three potential pathways that might subserve  
572 residual vision in hemianopia patients. They showed that two potential pathways (superior collicu-  
573 lus to hMT+ and the interhemispheric connections between hMT+) did not differ in microstructure  
574 between those with and without blindsight. In contrast, the pathway between LGN and hMT+ in  
575 the damaged side differed significantly across individuals with and without blindsight. Patients  
576 with blindsight had comparable FA and MD in damaged and intact hemispheres. Patients without  
577 blindsight showed a loss of structural integrity within this tract in the damaged hemisphere (Ajina  
578 et al., 2015). These results provide an elegant example of how white matter microstructure mea-  
579 surements can be correlated with visual function in order to infer structure-function relationships.

## 580 **Summary**

581 Within the subcortical pathways, our review of the literature suggests that in vivo measurements  
582 of white matter microstructure can provide sensitive and reliable measurements of the effects  
583 of experience on white matter. Studies consistently find the expected deterioration within both  
584 the optic tract and the optic radiations in the case of peripheral blindness. Similarly, analysis of  
585 subcortical pathways in blindsight have shown consistent results across several cases, and are  
586 interpretable based on the functional and pre-existing neuroanatomical literature.

587 In contrast, it has proved surprisingly difficult to obtain consistent results for measurements  
588 of cortico-cortico connectivity across different studies. These discrepancies in the literature are  
589 somewhat surprising given the gross differences in visual experience that occurs in early and  
590 even late blind individuals. One possible explanation is that, as described above, most studies  
591 (though with a few exceptions, e.g. Wang et al. (2013)) have tended to have relatively low statistical

592 power. Larger sample sizes (perhaps through a multi-center study) might better reveal more subtle  
593 anatomical differences in connectivity as a result of early blindness. A second factor may be  
594 methodological differences across studies – early blind subjects are anatomically distinct within  
595 occipital cortex – for example occipital cortex shows less folding in animal models (Dehay et al.,  
596 1996), which may affect estimates of white matter tracts that are based on methods involving  
597 normalization to a canonical template. Comparing results based on tracts identified based on  
598 normalization to anatomical templates to those obtained using tracts identified within individual  
599 anatomies may provide some insight into how these very different approaches compare in terms  
600 of sensitivity and reliability.

601 It has also proved surprisingly difficult to interpret alterations in white matter cortico-cortico  
602 connectivity in the context of the functional literature – occipito-temporal and occipito-frontal white  
603 matter connections have consistently been shown to be weaker in early blind subjects, despite  
604 the apparent recruitment of occipital cortex for language. This discrepancy between estimates  
605 of white matter connectivity and functional role within cortico-cortical tracts makes it clear that  
606 drawing direct conclusions from white matter microstructure to functional role is still fraught with  
607 difficulty. This is not a reason to abandon the enterprise, but rather provides a critical challenge. To  
608 return to the argument with which we began this chapter – the effects of visual deprivation provide  
609 an excellent model system for testing how well we understand the measurement and interpretation  
610 of in vivo measurements of white matter infrastructure.

## 611 **4 Properties of white matter circuits involved in face perception**

612 In the visual system, neural signals are transmitted through some of the most prominent long-  
613 range fiber tracts in the brain: the optic radiations splay out from the thalamus to carry visual  
614 signals to primary visual cortex; the forceps major, u-shaped fibers that traverse the splenium of  
615 the corpus callosum, innervate the occipital lobes allowing them to integrate neural signals; the in-  
616 ferior longitudinal fasciculus (ILF) is the primary occipito-temporal associative tract (Crosby, 1962;  
617 Gloor, 1997) that propagates signals through ventral visual cortex between primary visual cortex  
618 and the anterior temporal lobe (see Figure 9a); and, finally, the inferior fronto-occipital fasciculus  
619 (IFOF) begins in the occipital cortex, continues medially through the temporal cortex dorsal to the  
620 uncinate fasciculus, and terminates in the inferior frontal and dorsolateral frontal cortex (see Fig-  
621 ure 9a; Catani et al. (2002). Increasingly, diffusion neuroimaging studies are providing evidence  
622 indicating the importance of these white matter tracts for visual behavior. Here, we present evi-  
623 dence from converging streams of our research demonstrating that the structural properties of the  
624 ILF and IFOF are critically important for intact face perception.

625 Face perception is a complex suite of visual behaviors that is subserved by a distributed net-  
626 work of neural regions, many of which are structurally connected by the ILF and IFOF. For example,  
627 the “core” or posterior regions include the occipital face area (OFA), the fusiform face area (FFA),  
628 and the posterior superior temporal sulcus (pSTS) and the “extended” areas include the ante-  
629 rior temporal pole (ATP), amygdala, and ventro-medial prefrontal cortex (vmPFC) (Gobbini and  
630 Haxby, 2007). Recently, functional neuroimaging studies have provided supporting, albeit indirect,  
631 evidence of rapid interactions between these posterior core regions and the extended anterior  
632 regions (e.g., anterior temporal lobe and amygdala) that implicate the involvement of long-range  
633 association fiber tracts that connect these regions, including the ILF and the IFOF (Bar et al., 2006;  
634 Gschwind et al., 2012; Rudrauf et al., 2008; Song et al., 2015).

635 Finally, damage to either of these pathways disrupts face processing (Catani et al., 2003;  
636 Catani and Thiebaut de Schotten, 2008; Fox et al., 2008; Philippi et al., 2009; Thomas et al.,

2009), suggesting that these white matter tracts serve as a critical component of the neural system necessary for face processing. In what follows, we provide evidence showing that age-related changes in the structural properties of these tracts in early development is associated with emergent properties of the functional neural network supporting face processing. We also review evidence that age-related decreases in the structural properties of these tracts in aging adults exist and are associated with decrements in face processing behavior. Finally, we review data showing that relative deficits in the structural properties of these long-range fiber tracts potentially explain the causal nature of face blindness in individuals with congenital prosopagnosia. Together these findings converge to indicate that the structural properties of white matter tracts, and the ILF and IFOF in particular, are necessary for skilled face perception.

Across all of these studies, we use a common methodological approach. We acquire diffusion images, analyze them using a tensor model, and perform deterministic tractography using the Fiber Assignment of Continuous Tracking (FACT) algorithm and brute-force fiber reconstruction approach (Mori et al., 1999; Xue et al., 1999) with fairly standard parameters. To extract the tracts of interest, we use a multiple region of interest (ROI) approach that is very similar to Wakana et al (Wakana et al., 2007). From each tract, we extract the volume (the number of voxels through which the fibers pass multiplied by the volume of the voxel) as well as the mean fractional anisotropy (FA), mean diffusivity (MD), axial diffusivity (AD), and radial diffusivity (RD) values across these voxels.

## Age-related changes in the ILF and IFOF with functional neural change

The central question guiding this work was whether developmental differences in the structural properties of the ILF and IFOF, defined independently using anatomical ROIs, are related to developmental differences in the characteristics of the functional face-processing regions connected by these tracts (Scherf et al., 2014). Across participants whose ages covered a substantial range (ages 6-23 years), we evaluated differences in (1) the macro- and microstructural properties of the fasciculi, and in (2) the functional profile (size, location, and magnitude of selectivity) of the face- and place-selective regions that are distributed along the trajectory of the pathways of interest using functional magnetic resonance imaging (fMRI). First, we found that all tracts, with the exception of the left IFOF, exhibited age-related improvements in their microstructural properties, evincing a significant decrease in mean and radial, but not axial, diffusivity from childhood to early adulthood (see Figure 9b). This result is consistent with the idea that the increasingly restricted diffusion perpendicular to the axons in these tracts reflects continued myelination from childhood through early adulthood. The left IFOF exhibited stable levels of microstructural properties across the age range, indicating that it may be a very early developing fiber tract. At the macro-structural level, only the ILF exhibited an age-related change in volume, which was evident in both hemispheres. The combined increases in micro-structural properties and the volume of the right ILF suggest that it is becoming increasingly myelinated and/or more densely packed with axons with age (Beaulieu, 2002; Lebel and Beaulieu, 2011; Song et al., 2005).

Having identified the structural changes that potentially contribute to circuit organization, we explored, concomitant differences in the functional profile of face-related cortical regions, and then examined the joint structure-function correspondences. Across the full age range, individuals with larger right FFA volumes also exhibited larger right ILF volumes (see Figure 9c). Neither the right OFA nor the right PPA exhibited this structure-function relation with the right ILF. This structure-function relation between the right FFA and right ILF was also present in just the children and adolescents (aged 6-15 years). However, once age was accounted for in the same model as size of the right FFA in the children and adolescents, the age effects on the volume of the ILF swamped all the significant variation, even though the size of the right FFA increased significantly

683 across this age range. One interpretation of these findings is that the neural activity generated by  
684 larger functional regions may require and/or influence the development of larger fiber tracts (via  
685 increasing myelination of existing axons and/or more densely packed axons) to support the trans-  
686 mission of neural signals emanating from such regions. It may also be that increasing the integrity  
687 of the structural architecture of fiber tracts increases the propagation of neural signal throughout  
688 the circuit, thereby enhancing the functional characteristics of the nodes within the circuit (and  
689 vice versa). In other words, structural refinements of white matter tracts may precede, and even  
690 be necessary for, functional specialization of the circuit to emerge. In sum, this work uncovers the  
691 key contributions of the ILF and IFOF and their relationship to functional selectivity in the develop-  
692 ing circuitry that mediates face perception. Aging related decrease in structural properties of IFOF  
693 with face perception deficits While the findings above focus on understanding how the structural  
694 properties of the ILF and IFOF are critical for building the complex face processing network during  
695 early development, it was also important to understand whether disruptions in these white matter  
696 tracts might be associated with, or even responsible for, age-related declines in face processing  
697 that are well reported (e.g., Salthouse (2004)) and are not solely a function of memory or learning  
698 changes (Boutet and Faubert, 2006). We scanned 28 individuals aged 18-86 years using a diffu-  
699 sion tensor imaging protocol (Thomas et al., 2008). We also tested them in face and car perceptual  
700 discrimination tasks. We observed that the right IFOF was the only tract that decreased in volume  
701 (as measured by percent of fibers and voxels through which the fibers pass) as a function of age.  
702 In contrast, the bilateral IFOF and the left, but not right, ILF exhibited age-related decreases in  
703 FA (see Figure 9d). To summarize, it is the IFOF in the right hemisphere that shows particular  
704 age-related vulnerability, although there is a tendency for the tracts in the left hemisphere to show  
705 some reduction in microstructural properties, as revealed in FA values, as well.

706 On the discrimination tasks, participants performed more poorly on the difficult trials, especially  
707 in the face compared to the car condition. Of relevance though is that the older individuals, the 60-  
708 and 80-year-olds, made significantly more errors on faces than they did on cars, and performance  
709 was almost at chance in the difficult condition. Given that there were age-related declines in the  
710 micro- and macro-structural properties of the IFOF as well as in face perception behavior, our  
711 final question was whether there was an association between these tract and behavioral deficits.  
712 To address this question, we examined correlations between behavioral performance and the  
713 normalized percentage of fibers, normalized percentage of voxels and average FA values in the  
714 ILF and IFOF in each hemisphere. We observed two main findings: a. during the easy face trials,  
715 participants with greater percentage of fibers in the right IFOF, exhibited better performance in  
716 these easy discriminations and b. during the difficult face trials, participants with higher FA values  
717 and larger volume right IFOF exhibited better performance on the difficult discriminations. Taken  
718 together, these findings indicate a clear association between the ability to discriminate between  
719 faces and the macro- and micro-structural properties of the IFOF in the right hemisphere.

## 720 **Disruptions in ILF and IFOF may explain face blindness**

721 Finally, given the findings of an association between face processing behavior and the structural  
722 properties of the IFOF in typically developing adults, we investigated whether congenital prosopag-  
723 nosia, a condition that is characterized by an impairment in the ability to recognize faces despite  
724 normal sensory vision and intelligence, might arise from a disruption to either and/or both the ILF  
725 and IFOF (Thomas et al., 2009). This hypothesis emerged following empirical findings that the  
726 core functional neural regions, including the FFA, appeared to produce normal neural signals in  
727 many congenital prosopagnosic individuals (Avidan et al., 2014, 2005; Thomas et al., 2009). To  
728 test this hypothesis, we scanned 6 adults with congenital prosopagnosia, all of whom evinced

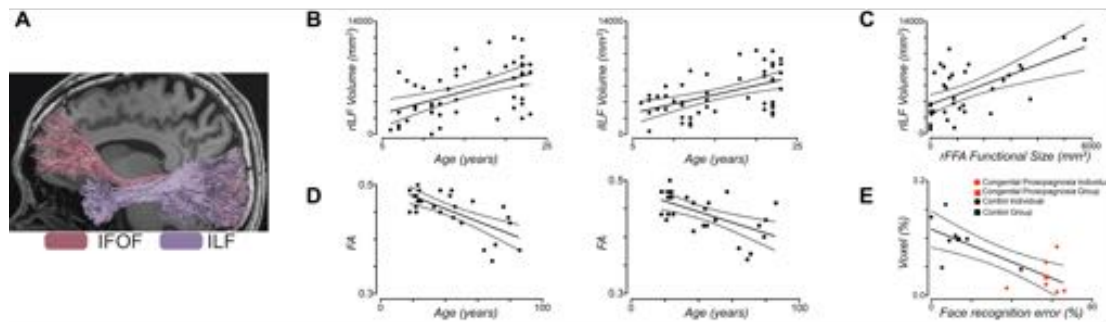

**Figure 9: The Role of the ILF and IFOF in face perception.** **A** Representative example of fibers extracted from the inferior longitudinal fasciculus (ILF), which is the primary occipito-temporal associative tract (Crosby, 1962; Gloor, 1997) that propagates signals through ventral visual cortex between primary visual cortex and the anterior temporal lobe; and, from the finally, the inferior fronto-occipital fasciculus (IFOF), which begins in the occipital cortex, continues medially through the temporal cortex dorsal to the uncinate fasciculus, and terminates in the inferior frontal and dorsolateral frontal cortex (Catani et al., 2002). **B** In typically developing individuals, there is a systematic age-related increase in the macro-structural properties of both the right and left ILF, which is measured here by the volume of the tract in cubic millimeters, across the first two decades of life. **C** We observed a joint structure-function correspondence between the size of the individually defined functional right fusiform face area and the volume of the right ILF, which held even when age was accounted for (Scherf et al., 2014). **D** In typically developing adults, there is a systematic age-related decline in the micro-structural properties of both the right and left IFOF, as measured by the mean FA, indicating that it is disproportionately vulnerable compared to the ILF during the aging process. **E** Individuals who have a lifetime history of face blindness, an inability to recognize faces in spite of normal intelligence and sensory vision, have systematically smaller volume visual fiber tracts, particularly in the right ILF, as depicted here, compared to age-matched control participants. Together, these findings provide converging evidence that these two major tracts, the IFOF and the ILF, carry signals important for face perception.

729 normal BOLD activation in the core face regions (Avidan et al., 2005), and 17 age- and gender-  
730 matched control adults. We also measured participants' face recognition skills. Relative to the  
731 controls, the congenital prosopagnosia (CP) group showed a marked reduction in both the macro-  
732 and micro-structural properties of the ILF and IFOF bilaterally. We then carried out a stepwise re-  
733 gression analysis with the connectivity and behavioral measures. Across participants, individuals  
734 with the worse face recognition behavior had the lowest FA and smallest volume right ILF (see  
735 Figure 10e). Similarly, poor face recognition behavior was also related to smaller volume of the  
736 right IFOF, as well. In summary, our study reveals that the characteristic behavioral profile of con-  
737 genital prosopagnosia may be ascribed to a disruption in structural connectivity in some portion of  
738 the ILF and, perhaps to a lesser extent, the IFOF (for related findings, see Gomez et al. (2015);  
739 Song et al. (2015)).



## 740 **Summary**

741 We have presented converging evidence that face recognition is contingent upon efficient com-  
742 munication across disparate nodes of a widely distributed network, which are connected by long  
743 range fiber tracts. Specifically, we have shown that two major tracts, the IFOF and the ILF, carry  
744 signals important for face perception. Studies in children and older individuals, as well as investi-  
745 gations with individuals who are face blind all attest to the required integrity of the tracts for normal  
746 face recognition behavior. Early in development the ILF undergoes a particularly long trajectory  
747 in which both the micro- and macro-structural properties change in ways indicative of increasing  
748 myelination. Of relevance for the integrity of face perception behavior, there is a highly selec-  
749 tive and tight correspondence between age-related growth in one of the pre-eminent functional  
750 nodes of the face-processing neural network, the right FFA, and these age-related improvements  
751 in the structural properties of the ILF. These findings reflect the dynamic and intimate nature of  
752 the relation between brain structure and function, particularly with respect to role of white matter  
753 tracts, in setting up neural networks that support complex behaviors like face perception. Our  
754 work with congenital prosopagnosic participants suggests that face-processing behavior will not  
755 develop normally when this developmental process is disrupted. Future work will need to identify  
756 when, developmentally, white matter disruptions are present and interfere with face perception. Fi-  
757 nally, our work in aging adults indicates that the IFOF, is particularly vulnerable with age, which can  
758 lead to difficulties with face recognition behavior. However, Grossi and colleagues (Grossi et al.,  
759 2014) reported that an adult with progressive prosopagnosia, a gradual and selective inability to  
760 recognize and identify faces of familiar people, had markedly reduced volume ILF in the right, but  
761 not left hemisphere, whereas the bilateral IFOF tracts were preserved. This suggests that there  
762 may be some conditions in adulthood in which the ILF is also vulnerable. Together, these findings  
763 converge on the claim that the structural properties of white matter circuits are, indeed, necessary  
764 for face perception.

## 765 **5 Conclusions, remarks and future directions**

766 The goal of the present article is to survey the range of findings about the specific importance  
767 of studying the white matter of the visual system. We focused on findings in human brains, that  
768 used the only currently available method to study the white matter in vivo in humans: diffusion  
769 MRI (dMRI). In the time since its invention in the 1990's, dMRI methods have evolved, and evi-  
770 dence about the importance of the white matter has accumulated (Fields, 2008b). These findings  
771 are modern, but they support a point of view about the nervous system that has existed for a long  
772 time. Connectionism, the theory that brain function arises from its connectivity structure goes back  
773 to classical work of the 19th century neurologists (Deacon, 1989). Over the years, interest in dis-  
774 connection syndromes waxed and waned, as more holistic views of the brain (Lashley, 1963) and  
775 more localizationist views of the brain prevailed. As a consequence, systems neuroscience has  
776 traditionally focused on understanding the response properties of individual neurons and cortical  
777 regions (Fields, 2013, 2004). Only a few studies were devoted to understanding the relation of the  
778 white matter to cognitive function. Similar to electrical cables, it was believed that the connections  
779 in the brain were either intact and functioning, or disconnected. However, the pendulum started  
780 swinging back dramatically towards connectionism already in the 1960's (Geschwind, 1965), and  
781 over the years, there has been increasing appreciation for the importance of brain networks in  
782 cognitive function, culminating in our current era of connectomics (Sporns et al., 2005). In addition  
783 to an increasing understanding of the importance of connectivity, views that emphasize the role

784 of tissue properties not related to neuronal firing in neural computation have more recently also  
785 evolved and come to the fore (Bullock et al., 2005; Fields, 2008b). For example, the role of glial  
786 cells in modulating synaptic transmission and neurotransmitter metabolism, as well as the role of  
787 the white matter in metabolism and neural hemodynamic coupling (Robel and Sontheimer, 2016).  
788 Today, we know much more about the white matter than ever before and we understand that the  
789 properties of the tissue affect how communication between distal brain areas is implemented. Dif-  
790 fusion MRI enables inferences about the properties of the white matter tissue in vivo, which in turn  
791 enables inferences about the connection between behavior and biology.

792 As we have seen in the examples presented above, dMRI is a useful method to study the  
793 biological basis of normal visual perception, to glean understanding about the connectivity that  
794 underlies the organization of the visual cortex, about the breakdowns in connectivity that occur in  
795 different brain disorders, and about the plasticity that arises in the system in response to visual  
796 deprivation. But while the findings reviewed above demonstrate the importance of the white mat-  
797 ter in our understanding of the visual system and the biological basis of visual perception, they  
798 also serve as a demonstration of the unique capacity of vision science to study a diverse set of  
799 phenomena across multiple levels of description. This is largely an outcome of the detailed un-  
800 derstanding of different parts of the visual system, and attributable to the powerful quantitative  
801 methods that have developed in the vision sciences to study the relationship between biology  
802 and perception. For these reasons the visual system has historically proven to be a good test-  
803 ing ground for new methodologies. Another recurring theme of the examples presented above is  
804 the importance of convergent evidence in cognitive neuroscience (Ochsner and Kosslyn, 1999).  
805 Studies of the human visual white matter exemplify this: evidence from behavior, from functional  
806 MRI, from developmental psychology, and from physiology converge to grant us a unique view  
807 about the importance of specific pathways for perception (see sections 2 and 4). For example,  
808 the response properties of different brain regions are heavily influenced by the synaptic inputs of  
809 long range connections: one might grow to better understand the response properties of dorsal  
810 visual areas, when their connection through the white matter with ventral visual areas is known  
811 (see section 2). Similarly, the role of different functional regions in the face-perception network  
812 becomes clearer when the relationship between the size of these regions, the size of the ILF and  
813 the co-development of these anatomical divisions is demonstrated (see section 4). The study of  
814 individuals with perceptual deficits or with visual deprivation demonstrates the specific importance  
815 of particular connections, and delineates the lifelong trajectory of the role of these trajectories,  
816 also revealing possibilities and limitations of brain plasticity (see sections 3). The importance of  
817 converging evidence underscores the manner in which understanding the white matter may con-  
818 tinue to have an effect on many other parts of cognitive neuroscience, even outside of the vision  
819 sciences.

820 Two major difficulties recur in the descriptions of findings reviewed above: the first is an ambi-  
821 guity in the interpretation of findings about connectivity. In the Introduction (1), we described the  
822 Fiber Detection Problem. The FDP creates a pervasive difficulty in the interpretation of many of  
823 the findings regarding connectivity. It limits our ability to discover new tracts with tractography, and  
824 limits the interpretation of individual differences in connectivity. Changes in tractography methods  
825 or measurement parameters may reduce the missed fascicles or the false alarms, but it does not  
826 speak to increased sensitivity in detection of white matter pathways. Indeed recent reports demon-  
827 strated that increasing the resolution of the data may be only part of the story. Unless high-quality  
828 data are also associated with an optimal choice of tracking methods important and known con-  
829 nections can be missed (Thomas et al., 2014). The dilemma is that the best tractography analysis  
830 method is likely to depend on the properties of the data, as well as the fascicle to be estimated.  
831 For this reason it has been proposed to use personalized approaches to tracking. For the time

832 being, no fixed set of rules will work in every case (Takemura et al., 2016). Nevertheless, finding  
833 major well-known tracts in individual humans is not a major problem, and can even be automated  
834 (Yendiki et al., 2011; Yeatman et al., 2012; Kammen et al., 2015).

835 The other difficulty relates to the interpretation of microstructural properties such as FA and  
836 MD. While these relate to biophysical properties of the tissue in the white matter, they contain  
837 inherent ambiguities. For example, FA may be higher in a specific location in one individual relative  
838 to another because of an increased density of myelin in that individual, but it may also be higher  
839 because of a decrease in the abundance of tracts crossing through this region. In the following  
840 last section, we outline a few directions that we believe will influence the future of the field, and  
841 perhaps help address some of these difficulties.

## 842 **Future directions**

843 One of the common threads across the wide array of research in human vision science using  
844 dMRI that we present and a source of frustration and confusion in reading the dMRI literature is  
845 the ambiguity in interpretation: changes in parameters of models of the tissue may be caused by  
846 different biological processes. Two promising directions that we hope will address these ambigu-  
847 ties in the future, or at least reduce them have to do with new developments in the measurements  
848 and modeling of MRI data in human white matter:

### 849 **Biophysical models and multi b-value models**

850 When more than one diffusion weighting b-value is collected, additional information about tissue  
851 microstructure can be derived from the data. This includes compartment models, that account  
852 for the signal as a combination of tensors (Clark and Le Bihan, 2000; Mulkern et al., 1999) or  
853 extends the Gaussian model with additional terms (so-called Diffusion Kurtosis Imaging; Jensen  
854 et al. (2005)). More recent models take into account the diffusion properties of different kinds of  
855 tissue. For example, the CHARMED model (Assaf and Basser, 2005), explicitly models intracellu-  
856 lar water contributions to the signal and extracellular water contributions. Other models describe  
857 axon diameter distribution (Assaf et al., 2008; Alexander et al., 2010), and dispersion and density  
858 of axons and neurites (Zhang et al., 2012). However, the field is also struggling with the ambiguity  
859 of these models (Jelescu et al., 2016), and this is a very active field of research (Ferizi et al.,  
860 2016). The ultimate goal of the field in these efforts is to develop methods and models that help  
861 infer physical quantities of the tissue that are independent of the measurement device. This goal  
862 can already be achieved with other forms of MRI measurements, which we will discuss next.

### 863 **Combining diffusion-weighted and quantitative MRI**

864 Quantitative MRI refers to an ever-growing collection of measurement methods that quantify the  
865 physical properties of neural tissue, such as their density (Mezer et al., 2013) or molecular com-  
866 position (Stüber et al., 2014). These methods have already been leveraged to understand the  
867 structure and properties of the visual field maps (Serenó et al., 2013; Bridge et al., 2014). Combi-  
868 nations of these methods with diffusion MRI can help reduce the ambiguity and provide even more  
869 specific information about tissue properties in the white matter (Stikov et al., 2011; Mezer et al.,  
870 2013; Assaf et al., 2013; Stikov et al., 2015; Mohammadi et al., 2015). For example, a recent study  
871 used this combination to study the biological basis of amblyopia (Duan et al., 2015).

## 872 Large open data-sets

873 The accumulation of large open datasets with thousands of participants will enable the creation of  
 874 models of individual variability at ever-finer resolution (Pestilli and Franco, 2015). This will enable  
 875 more confident inferences about the role of white matter in vision. The Human Connectome Project  
 876 (Van Essen et al., 2013) is already well on its way to providing a data set encompassing more than  
 877 a thousand participants, including not only high-quality dMRI data, but also measurements of fMRI  
 878 of the visual system. Another large publicly available dataset that includes measurements of both  
 879 dMRI and fMRI of visual areas is the Enhanced Nathan Klein Institute Rockland Sample (Nooner  
 880 et al., 2012). Crucially, the aggregation of large data-sets can be scaled many times if a culture  
 881 of data sharing pervades a larger portion of the research community (Gorgolewski and Poldrack,  
 882 2016) and as the technical tools that allow data-sharing become more wide-spread (Wandell et al.,  
 883 2015).

**Table 1:** Publicly available data-sets for analysis of visual white matter

| Data types                                                                                       | Number of available subjects           | Acquisition parameters                                                                | Link                                                                                                                                    | Relevant papers            |
|--------------------------------------------------------------------------------------------------|----------------------------------------|---------------------------------------------------------------------------------------|-----------------------------------------------------------------------------------------------------------------------------------------|----------------------------|
| Human Connectome Project                                                                         |                                        |                                                                                       |                                                                                                                                         |                            |
| Diffusion MRI, resting state functional MRI                                                      | 900 (as of May 2016 – eventually 1200) | b=1000, 2000, 3000, 90 directions each, 1.25 mm <sup>3</sup> isotropic resolution, 3T | <a href="http://humanconnectome.org/">http://humanconnectome.org/</a>                                                                   | Sotiropoulos et al. (2013) |
| NKI Rockland Enhanced                                                                            |                                        |                                                                                       |                                                                                                                                         |                            |
| Diffusion MRI, fMRI (including visual area localizer)                                            | >600 (as of July 2015)                 | b=1500, 137 directions, 2 mm <sup>3</sup> isotropic resolution, 3T                    | <a href="http://fcon_1000.projects.nitrc.org/indi/enhanced/index.html">http://fcon_1000.projects.nitrc.org/indi/enhanced/index.html</a> | Nooner et al. (2012)       |
| Data supplement to “A major human white matter pathway between dorsal and ventral visual cortex” |                                        |                                                                                       |                                                                                                                                         |                            |
| Diffusion MRI, ROIs of multiple visual field maps, tractography solutions                        | 5                                      | b=2000, 96 directions, 1.5 mm <sup>3</sup> isotropic resolution, 3T                   | <a href="https://purl.stanford.edu/bb060nk0241">https://purl.stanford.edu/bb060nk0241</a>                                               | Takemura et al. (2015)     |

## 884 Open source software for reproducible neuroscience

885 One of the challenges facing researchers that are using dMRI is the diversity of methods available  
 886 to analyze the data. To facilitate the adoption of methods and the comparison between different  
 887 methods, another important element in progress towards reproducible science is the transparency  
 888 of the methods. The combination of article text, software and data published in the notebooks that  
 889 accompany this article, demonstrates how scientific concepts and findings can be communicated  
 890 in writing, and augmented by the publication of computational methods that allow reproducing  
 891 some or all of the computations. This contributes to the understanding of the concepts, to sci-  
 892 entific education, the advancement of citizen science and supports computational reproducibility  
 893 (Donoho, 2010; McNutt, 2014; Stodden et al., 2014; Yaffe, 2015).

894 To allow this reproducibility, robust and transparent open-source implementations of the meth-  
 895 ods have become crucial. There are several open-source projects focused on dMRI, and we review  
 896 only a selection here (see also Table 2 for a selection of open source software for dMRI): the FM-  
 897 RIB Software Library (*FSL*) implements useful preprocessing tools (Andersson and Sotiropoulos,

898 2016), as well as individual voxel modeling (Behrens et al., 2003) and probabilistic tractography  
 899 (Behrens et al., 2007). The *MRtrix* library implements novel methods for analysis of individual  
 900 data, and group analysis (Tournier et al., 2012). *Vistasoft*, *mrTools*, *AFQ* and *LiFE* (Dougherty  
 901 et al., 2005; Yeatman et al., 2012; Pestilli et al., 2011; Hara et al., 2014; Pestilli et al., 2014) inte-  
 902 grate tools for analysis of visual fMRI with tools for dMRI analysis and tractography segmentation.  
 903 *Camino* provides a set of tools, with a particular focus on multi b-value analysis. *Dipy* (Garyfallidis  
 904 et al., 2014) capitalizes on the vibrant scientific Python community (Perez et al., 2010) and the  
 905 work of the Neuroimaging in Python community (Nipy; Millman and Brett (2007)) to provide imple-  
 906 mentations of a broad array of diffusion MRI methods, ranging from newer methods for estimation  
 907 of microstructural properties (Jensen and Helpert, 2010; Portegies et al., 2015; Fick et al., 2016;  
 908 Özarlan et al., 2013), methods for tract clustering and tract registration Garyfallidis et al. (2012,  
 909 2015), as well methods for statistical validation of dMRI analysis (Rokem et al., 2015; Pestilli et al.,  
 910 2014).

911 As available data-sets grow large, another promising direction is the adoption of approaches  
 912 from large-scale data analysis in neuroscience (Caiafa and Pestilli, 2015; Freeman, 2015). These  
 913 methods will enable more elaborate and computationally demanding models and methods to be  
 914 considered in the analysis of large, multi-participant dMRI datasets.

**Table 2:** A selection of open source software for dMRI analysis

| License                              | Details                                                                                                                                                                     | Recent release             | Website                                                                                                                                               | Relevant papers         |
|--------------------------------------|-----------------------------------------------------------------------------------------------------------------------------------------------------------------------------|----------------------------|-------------------------------------------------------------------------------------------------------------------------------------------------------|-------------------------|
| MRtrix                               |                                                                                                                                                                             |                            |                                                                                                                                                       |                         |
| Open source, Mozilla Public License  | Centered on implementations of methods developed by researchers at the Florey Institute and King's College (e.g., constrained spherical convolution Tournier et al. (2007)) | April 15th, 2016 (v0.3.14) | <a href="http://mrtrix.org/">http://mrtrix.org/</a>                                                                                                   | Tournier et al. (2012)  |
| Vistasoft                            |                                                                                                                                                                             |                            |                                                                                                                                                       |                         |
| Open source GPL, but requires Matlab | Implementations of methods developed by the Stanford Vistalab                                                                                                               | No public release cycle    | <a href="http://web.stanford.edu/group/vista/cgi-bin/wiki/index.php/Software">http://web.stanford.edu/group/vista/cgi-bin/wiki/index.php/Software</a> | Dougherty et al. (2007) |
| AFQ                                  |                                                                                                                                                                             |                            |                                                                                                                                                       |                         |
| Continued on next page               |                                                                                                                                                                             |                            |                                                                                                                                                       |                         |

Table 2 – continued from previous page

| License                                                                  | Details                                                                                                                                              | Recent release                 | Website                                                                                     | Relevant papers            |
|--------------------------------------------------------------------------|------------------------------------------------------------------------------------------------------------------------------------------------------|--------------------------------|---------------------------------------------------------------------------------------------|----------------------------|
| Open source GPL, but requires Matlab                                     | Automated extraction of major fiber groups and quantification of statistics along their length                                                       | November 2014 (v1.2)           | <a href="https://github.com/yeatmanlab/AFQ">https://github.com/yeatmanlab/AFQ</a>           | Yeatman et al. (2012)      |
| LiFE                                                                     |                                                                                                                                                      |                                |                                                                                             |                            |
| Open Source GPL, but requires Matlab                                     | Statistical evaluation of tractography solutions                                                                                                     | August 2013 (v0.1)             | <a href="http://francopestilli.github.io/life/">http://francopestilli.github.io/life/</a>   | Pestilli et al. (2014)     |
| FSL (The Oxford Center for Functional MRI of the Brain Software Library) |                                                                                                                                                      |                                |                                                                                             |                            |
| Open source released under a custom license, restricting commercial use  | Centered on methods developed at the Oxford FM-RIB,(Implementations of many preprocessing steps, as well as modeling and probabilistic tractography) | September 2015 (Version 5.0.9) | <a href="http://fsl.fmrib.ox.ac.uk/fsl/fslwiki/">http://fsl.fmrib.ox.ac.uk/fsl/fslwiki/</a> | Smith et al. (2004)        |
| Diffusion Imaging in Python (Dipy)                                       |                                                                                                                                                      |                                |                                                                                             |                            |
| Open source, BSD License                                                 | Methods for voxel reconstruction, tractography, tractography segmentation, clustering and alignment, and statistical evaluation                      | February 2016 (v0.11)          | <a href="http://dipy.org">http://dipy.org</a>                                               | Garyfallidis et al. (2014) |
| Camino                                                                   |                                                                                                                                                      |                                |                                                                                             |                            |
|                                                                          |                                                                                                                                                      |                                |                                                                                             | Continued on next page     |

Table 2 – continued from previous page

| License                                     | Details                                                                                                                                                                                                                        | Recent release        | Website                                                                                                                                                                                                                       | Relevant papers         |
|---------------------------------------------|--------------------------------------------------------------------------------------------------------------------------------------------------------------------------------------------------------------------------------|-----------------------|-------------------------------------------------------------------------------------------------------------------------------------------------------------------------------------------------------------------------------|-------------------------|
| Open source, artistic license               | General analysis methods (voxel reconstruction, probabilistic tractography, etc) and specialized methods developed by the microstructure imaging at UCL, with contributions from the PICSL group at University of Pennsylvania | May 2015              | <a href="http://camino.cs.ucl.ac.uk/">http://camino.cs.ucl.ac.uk/</a>                                                                                                                                                         | Cook et al. (2006)      |
| <b>NiftyFit</b>                             |                                                                                                                                                                                                                                |                       |                                                                                                                                                                                                                               |                         |
| Open source, BSD License                    | Diffusion and other qMRI (relaxometry) analysis methods                                                                                                                                                                        | May 2016 (v1.3.9)     | <a href="http://cmictig.cs.ucl.ac.uk/media-engagement/publications/niftyfit-multi-parametric-model-fitting-for-4">http://cmictig.cs.ucl.ac.uk/media-engagement/publications/niftyfit-multi-parametric-model-fitting-for-4</a> | Melbourne et al. (2016) |
| <b>MITK</b>                                 |                                                                                                                                                                                                                                |                       |                                                                                                                                                                                                                               |                         |
| Open source, BSD License                    | Many analysis methods, including global tractography                                                                                                                                                                           | March 2016 (v2016.03) | <a href="http://mitk.org/wiki/MITK">http://mitk.org/wiki/MITK</a>                                                                                                                                                             | Wolf et al. (2005)      |
| <b>DTI-TK</b>                               |                                                                                                                                                                                                                                |                       |                                                                                                                                                                                                                               |                         |
| Open source, GPL, but requires registration | Focused on analysis methods developed at the PICSL lab (University of Pennsylvania), including white matter morphometry                                                                                                        | October 2012          | <a href="http://dti-tk.sourceforge.net/pmwiki/pmwiki.php">http://dti-tk.sourceforge.net/pmwiki/pmwiki.php</a>                                                                                                                 | Zhang et al. (2010)     |

## 915 Acknowledgments

916 Ariel Rokem was funded through a grant by the Gordon & Betty Moore Foundation and the Alfred  
 917 P. Sloan Foundation to the University of Washington eScience Institute Data Science Environment.  
 918 Hiromasa Takemura is supported by Grant-in-Aid for JSPS Fellows. Holly Bridge is a Royal Society  
 919 University Research Fellow. The work described by K. Suzanne Scherf and Marlene Behrmann

920 was supported by Pennsylvania Department of Health SAP grant 4100047862 (M.B., K.S.S.),  
921 NICHD/NIDCD P01/U19 (M.B., PI-Nancy Minshew), NSF grant (BCS0923763) to M.B., National  
922 Institutes of Mental Health (MH54246) to M. B., NSF Science of Learning Center grant, “Temporal  
923 Dynamics of Learning Center” (PI: Gary Cottrell, Co-I: M.B.), a post-doctoral fellowship from the  
924 National Alliance for Autism Research to K.S.S. and Beatriz Luna, and by awards from the National  
925 Alliance of Autism Research to Cibu Thomas and Katherine Humphreys and from the Cure Autism  
926 Now foundation to Katherine Humphreys. Work described by Ione Fine, Holly Bridge and Andrew  
927 Bock was funded by the National Institutes of Health (EY-014645); Holly Bridge is a Royal Society  
928 University Research Fellow. Franco Pestilli was funded by the Indiana University College of Arts  
929 and Sciences, the Indiana Clinical and Translational Institute (NIH UL1-TR001108). We thank  
930 the Jupyter team at UC Berkeley and beyond for creating the notebook format that is used in  
931 the example code provided as a computational appendix, and the Freeman Lab at HHMI Janelia  
932 Research Campus for creating the “Binder” platform to run these notebooks. We thank Kendrick  
933 Kay, Brent McPherson, Daniel Bullock, Sophia Vinci-Booher, Sandra Hanekamp, Shiloh Cooper,  
934 Brian Allen, Ian Chavez for comments on early versions of the manuscript.

## 935 **References**

- 936 Aganj, I., Lenglet, C., Jahanshad, N., Yacoub, E., Harel, N., Thompson, P. M., and Sapiro, G.  
937 (2011). A hough transform global probabilistic approach to multiple-subject diffusion MRI trac-  
938 tography. *Med. Image Anal.*, 15(4):414–425.
- 939 Ajina, S., Pestilli, F., Rokem, A., Kennard, C., and Bridge, H. (2015). Human blindsight is mediated  
940 by an intact geniculo-extrastriate pathway. *Elife*, 4.
- 941 Alary, F., Duquette, M., Goldstein, R., Elaine Chapman, C., Voss, P., La Buissonnière-Ariza, V.,  
942 and Lepore, F. (2009). Tactile acuity in the blind: a closer look reveals superiority over the  
943 sighted in some but not all cutaneous tasks. *Neuropsychologia*, 47(10):2037–2043.
- 944 Alexander, D. C., Barker, G. J., and Arridge, S. R. (2002). Detection and modeling of non-gaussian  
945 apparent diffusion coefficient profiles in human brain data. *Magn. Reson. Med.*, 48(2):331–340.
- 946 Alexander, D. C., Hubbard, P. L., Hall, M. G., Moore, E. A., Ptito, M., Parker, G. J. M., and Dyrby,  
947 T. B. (2010). Orientationally invariant indices of axon diameter and density from diffusion MRI.  
948 *Neuroimage*, 52(4):1374–1389.
- 949 Allen, B., Spiegel, D. P., Thompson, B., Pestilli, F., and Rokers, B. (2015). Altered white matter in  
950 early visual pathways of humans with amblyopia. *Vision Res.*, 114:48–55.
- 951 Alvarez, I., Schwarzkopf, D. S., and Clark, C. A. (2015). Extrastriate projections in human optic  
952 radiation revealed by fMRI-informed tractography. *Brain Struct. Funct.*, 220(5):2519–2532.
- 953 Amano, K., Wandell, B. A., and Dumoulin, S. O. (2009). Visual field maps, population receptive  
954 field sizes, and visual field coverage in the human MT+ complex. *J. Neurophysiol.*, 102:2704–  
955 2718.
- 956 Andersson, J. L. R. and Sotiropoulos, S. N. (2016). An integrated approach to correction for  
957 off-resonance effects and subject movement in diffusion MR imaging. *Neuroimage*, 125:1063–  
958 1078.



- 959 Arcaro, M. J., McMains, S. A., Singer, B. D., and Kastner, S. (2009). Retinotopic organization of  
960 human ventral visual cortex. *J. Neurosci.*, 29:10638–10652.
- 961 Arcaro, M. J., Pinsk, M. A., and Kastner, S. (2015). The anatomical and functional organization of  
962 the human visual pulvinar. *J. Neurosci.*, 35(27):9848–9871.
- 963 Ashida, H., Lingnau, A., Wall, M. B., and Smith, A. T. (2007). fMRI adaptation reveals separate  
964 mechanisms for first-order and second-order motion. *J. Neurophysiol.*, 97(2):1319–1325.
- 965 Assaf, Y., Alexander, D. C., Jones, D. K., Bizzi, A., Behrens, T. E. J., Clark, C. A., Cohen, Y.,  
966 Dyrby, T. B., Huppi, P. S., Knoesche, T. R., LeBihan, D., Parker, G. J. M., Poupon, C., CONNECT  
967 consortium, Anaby, D., Anwender, A., Bar, L., Barazany, D., Blumenfeld-Katzir, T., De-Santis, S.,  
968 Duclap, D., Figini, M., Fischl, E., Guevara, P., Hubbard, P., Hofstetter, S., Jbabdi, S., Kunz, N.,  
969 Lazeyras, F., Lebois, A., Liptrot, M. G., Lundell, H., Mangin, J.-F., Dominguez, D. M., Morozov, D.,  
970 Schreiber, J., Seunarine, K., Nava, S., Poupon, C., Riffert, T., Sasson, E., Schmitt, B., Shemesh,  
971 N., Sotiropoulos, S. N., Tavor, I., Zhang, H. G., and Zhou, F.-L. (2013). The CONNECT project:  
972 Combining macro- and micro-structure. *Neuroimage*, 80:273–282.
- 973 Assaf, Y. and Basser, P. J. (2005). Composite hindered and restricted model of diffusion  
974 (CHARMED) MR imaging of the human brain. *Neuroimage*, 27(1):48–58.
- 975 Assaf, Y., Blumenfeld-Katzir, T., Yovel, Y., and Basser, P. J. (2008). AxCaliber: a method for  
976 measuring axon diameter distribution from diffusion MRI. *Magn. Reson. Med.*, 59(6):1347–  
977 1354.
- 978 Avidan, G., Hasson, U., Malach, R., and Behrmann, M. (2005). Detailed exploration of face-  
979 related processing in congenital prosopagnosia: 2. functional neuroimaging findings. *J. Cogn.*  
980 *Neurosci.*, 17(7):1150–1167.
- 981 Avidan, G., Tanzer, M., Hadj-Bouziane, F., Liu, N., Ungerleider, L. G., and Behrmann, M. (2014).  
982 Selective dissociation between core and extended regions of the face processing network in  
983 congenital prosopagnosia. *Cereb. Cortex*, 24(6):1565–1578.
- 984 Backus, B. T., Fleet, D. J., Parker, A. J., and Heeger, D. J. (2001). Human cortical activity correlates  
985 with stereoscopic depth perception. *J. Neurophysiol.*, 86(4):2054–2068.
- 986 Bar, M., Kassam, K. S., Ghuman, A. S., Boshyan, J., Schmid, A. M., Schmidt, A. M., Dale, A. M.,  
987 Hämäläinen, M. S., Marinkovic, K., Schacter, D. L., Rosen, B. R., and Halgren, E. (2006). Top-  
988 down facilitation of visual recognition. *Proc. Natl. Acad. Sci. U. S. A.*, 103(2):449–454.
- 989 Basser, P. J., Mattiello, J., and LeBihan, D. (1994a). Estimation of the effective self-diffusion tensor  
990 from the NMR spin echo. *J. Magn. Reson. B*, 103(3):247–254.
- 991 Basser, P. J., Mattiello, J., and LeBihan, D. (1994b). MR diffusion tensor spectroscopy and imaging.  
992 *Biophys. J.*, 66(1):259–267.
- 993 Bastiani, M. and Roebroek, A. (2015). Unraveling the multiscale structural organization and  
994 connectivity of the human brain: the role of diffusion MRI. *Front. Neuroanat.*, 9.
- 995 Beaulieu, C. (2002). The basis of anisotropic water diffusion in the nervous system – a technical  
996 review. *NMR Biomed.*, 15(7-8):435–455.

- 997 Beaulieu, C., Does, M. D., Snyder, R. E., and Allen, P. S. (1996). Changes in water diffusion due  
998 to wallerian degeneration in peripheral nerve. *Magn. Reson. Med.*, 36(4):627–631.
- 999 Bedny, M., Pascual-Leone, A., Dodell-Feder, D., Fedorenko, E., and Saxe, R. (2011). Language  
1000 processing in the occipital cortex of congenitally blind adults. *Proc. Natl. Acad. Sci. U. S. A.*,  
1001 108(11):4429–4434.
- 1002 Behrens, T., Woolrich, M. W., Jenkinson, M., Johansen-Berg, H., Nunes, R. G., Clare, S.,  
1003 Matthews, P. M., Brady, J. M., and Smith, S. M. (2003). Characterization and propagation of  
1004 uncertainty in diffusion-weighted MR imaging. *Magn. Reson. Med.*, 50(5):1077–1088.
- 1005 Behrens, T. E. J., Berg, H. J., Jbabdi, S., Rushworth, M. F. S., and Woolrich, M. W. (2007). Prob-  
1006 abilistic diffusion tractography with multiple fibre orientations: What can we gain? *Neuroimage*,  
1007 34(1):144–155.
- 1008 Bengtsson, S. L., Nagy, Z., Skare, S., Forsman, L., Forssberg, H., and Ullén, F. (2005). Extensive  
1009 piano practicing has regionally specific effects on white matter development. *Nat. Neurosci.*,  
1010 8(9):1148–1150.
- 1011 Blumenfeld-Katzir, T., Pasternak, O., Dagan, M., and Assaf, Y. (2011). Diffusion MRI of structural  
1012 brain plasticity induced by a learning and memory task. *PLoS One*, 6(6):e20678.
- 1013 Bock, A. S. and Fine, I. (2014). Anatomical and functional plasticity in early blind individuals and  
1014 the mixture of experts architecture. *Front. Hum. Neurosci.*, 8:971.
- 1015 Bock, A. S., Saenz, M., Tungaraza, R., Boynton, G. M., Bridge, H., and Fine, I. (2013). Visual  
1016 callosal topography in the absence of retinal input. *Neuroimage*, 81:325–334.
- 1017 Boutet, I. and Faubert, J. (2006). Recognition of faces and complex objects in younger and older  
1018 adults. *Mem. Cognit.*, 34(4):854–864.
- 1019 Brewer, A. A., Liu, J., Wade, A. R., and Wandell, B. A. (2005). Visual field maps and stimulus  
1020 selectivity in human ventral occipital cortex. *Nat. Neurosci.*, 8:1102–1109.
- 1021 Bridge, H., Clare, S., and Krug, K. (2014). Delineating extrastriate visual area MT(V5) using  
1022 cortical myeloarchitecture. *Neuroimage*, 93 Pt 2:231–236.
- 1023 Bridge, H., Cowey, A., Ragge, N., and Watkins, K. (2009). Imaging studies in congenital anoph-  
1024 thalmia reveal preservation of brain architecture in 'visual' cortex. *Brain*, 132(Pt 12):3467–3480.
- 1025 Bridge, H., Hicks, S. L., Xie, J., Okell, T. W., Mannan, S., Alexander, I., Cowey, A., and Kennard,  
1026 C. (2010). Visual activation of extra-striate cortex in the absence of V1 activation. *Neuropsy-  
1027 chologia*, 48(14):4148–4154.
- 1028 Bridge, H., Thomas, O., Jbabdi, S., and Cowey, A. (2008). Changes in connectivity after visual  
1029 cortical brain damage underlie altered visual function. *Brain*, 131(Pt 6):1433–1444.
- 1030 Bullock, T. H., Bennett, M. V. L., Johnston, D., Josephson, R., Marder, E., and Fields, R. D. (2005).  
1031 Neuroscience. the neuron doctrine, redux. *Science*, 310(5749):791–793.
- 1032 Burton, H., Diamond, J. B., and McDermott, K. B. (2003). Dissociating cortical regions activated  
1033 by semantic and phonological tasks: a fMRI study in blind and sighted people. *J. Neurophysiol.*,  
1034 90(3):1965–1982.

- 1035 Caiafa, C. F. and Pestilli, F. (2015). Sparse multiway decomposition for analysis and modeling of  
1036 diffusion imaging and tractography.
- 1037 Catani, M., Bodi, I., and Dell'Acqua, F. (2012). Comment on “the geometric structure of the brain  
1038 fiber pathways”. *Science*, 337(6102):1605.
- 1039 Catani, M., Howard, R. J., Pajevic, S., and Jones, D. K. (2002). Virtual in vivo interactive dissection  
1040 of white matter fasciculi in the human brain. *Neuroimage*, 17(1):77–94.
- 1041 Catani, M., Jones, D. K., Donato, R., and Ffytche, D. H. (2003). Occipito-temporal connections in  
1042 the human brain. *Brain*, 126(Pt 9):2093–2107.
- 1043 Catani, M. and Thiebaut de Schotten, M. (2008). A diffusion tensor imaging tractography atlas for  
1044 virtual in vivo dissections. *Cortex*, 44(8):1105–1132.
- 1045 Clark, C. A. and Le Bihan, D. (2000). Water diffusion compartmentation and anisotropy at high b  
1046 values in the human brain. *Magn. Reson. Med.*, 44(6):852–859.
- 1047 Cohen, L. G., Celnik, P., Pascual-Leone, A., Corwell, B., Falz, L., Dambrosia, J., Honda, M.,  
1048 Sadato, N., Gerloff, C., Catalá, M. D., and Hallett, M. (1997). Functional relevance of cross-  
1049 modal plasticity in blind humans. *Nature*, 389(6647):180–183.
- 1050 Conturo, T. E., Lori, N. F., Cull, T. S., Akbudak, E., Snyder, A. Z., Shimony, J. S., McKinstry, R. C.,  
1051 Burton, H., and Raichle, M. E. (1999). Tracking neuronal fiber pathways in the living human  
1052 brain. *Proc. Natl. Acad. Sci. U. S. A.*, 96(18):10422–10427.
- 1053 Cook, P. A., Bai, Y., Nedjati-Gilani, S., Seunarine, K. K., Hall, M. G., Parker, G. J., and Alexander,  
1054 D. C. (2006). Camino: open-source diffusion-MRI reconstruction and processing. In *14th*  
1055 *scientific meeting of the international society for magnetic resonance in medicine*, volume 2759.
- 1056 Côté, M.-A., Girard, G., Boré, A., Garyfallidis, E., Houde, J.-C., and Descoteaux, M. (2013). Trac-  
1057 tometer: towards validation of tractography pipelines. *Med. Image Anal.*, 17(7):844–857.
- 1058 Cottureau, B. R., McKee, S. P., Ales, J. M., and Norcia, A. M. (2011). Disparity-tuned population  
1059 responses from human visual cortex. *J. Neurosci.*, 31(3):954–965.
- 1060 Coullon, G. S. L., Emir, U. E., Fine, I., Watkins, K. E., and Bridge, H. (2015). Neurochemical  
1061 changes in the pericalcarine cortex in congenital blindness attributable to bilateral anophthalmia.  
1062 *J. Neurophysiol.*, 114(3):1725–1733.
- 1063 Crosby, E. C. (1962). *Correlative anatomy of the nervous system*. Macmillan.
- 1064 Daducci, A., Alessandro, D., Palu, A. D., Alia, L., and Jean-Philippe, T. (2015). COMMIT: Convex  
1065 optimization modeling for microstructure informed tractography. *IEEE Trans. Med. Imaging*,  
1066 34(1):246–257.
- 1067 Daducci, A., Dal Palú, A., Descoteaux, M., and Thiran, J.-P. (2016). Microstructure informed  
1068 tractography: Pitfalls and open challenges. *Front. Neurosci.*, 10:247.
- 1069 De Volder, A. G., Bol, A., Blin, J., Robert, A., Arno, P., Grandin, C., Michel, C., and Veraart, C.  
1070 (1997). Brain energy metabolism in early blind subjects: neural activity in the visual cortex.  
1071 *Brain Res.*, 750(1-2):235–244.

- 1072 Deacon, T. (1989). Holism and associationism in neuropsychology: An anatomical synthesis.  
1073 *Integrating theory and practice in clinical neuropsychology*, pages 1–47.
- 1074 Dehay, C., Giroud, P., Berland, M., Killackey, H. P., and Kennedy, H. (1996). Phenotypic character-  
1075 isation of respecified visual cortex subsequent to prenatal enucleation in the monkey: develop-  
1076 ment of acetylcholinesterase and cytochrome oxidase patterns. *J. Comp. Neurol.*, 376(3):386–  
1077 402.
- 1078 Déjerine, J. (1895). *Anatomie des centres nerveux*, volume 1. Rueff et Cie., Paris.
- 1079 Dell’Acqua, F., Rizzo, G., Scifo, P., Clarke, R. A., Scotti, G., and Fazio, F. (2007). A model-based  
1080 deconvolution approach to solve fiber crossing in diffusion-weighted MR imaging. *IEEE Trans.*  
1081 *Biomed. Eng.*, 54(3):462–472.
- 1082 DeYoe, E. A., Bandettini, P., Neitz, J., Miller, D., and Winans, P. (1994). Functional magnetic  
1083 resonance imaging (fMRI) of the human brain. *J. Neurosci. Methods*, 54:171–187.
- 1084 Dietrich, S., Hertrich, I., Kumar, V., and Ackermann, H. (2015). Experience-related structural  
1085 changes of degenerated occipital white matter in late-blind humans - a diffusion tensor imaging  
1086 study. *PLoS One*, 10(4):e0122863.
- 1087 Donoho, D. L. (2010). An invitation to reproducible computational research. *Biostatistics*,  
1088 11(3):385–388.
- 1089 Dougherty, R. F., Ben-Shachar, M., Bammer, R., Brewer, A. A., and Wandell, B. A. (2005). Func-  
1090 tional organization of human occipital-callosal fiber tracts. *Proc. Natl. Acad. Sci. U. S. A.*,  
1091 102:7350–7355.
- 1092 Dougherty, R. F., Ben-Shachar, M., Deutsch, G. K., Hernandez, A., Fox, G. R., and Wandell, B. A.  
1093 (2007). Temporal-callosal pathway diffusivity predicts phonological skills in children. *Proc. Natl.*  
1094 *Acad. Sci. U. S. A.*, 104:8556–8561.
- 1095 Duan, Y., Norcia, A. M., Yeatman, J. D., and Mezer, A. (2015). The structural properties of major  
1096 white matter tracts in strabismic AmblyopiaMajor white matter tracts in strabismic amblyopia.  
1097 *Invest. Ophthalmol. Vis. Sci.*, 56(9):5152–5160.
- 1098 Dubner, R. and Zeki, S. M. (1971). Response properties and receptive fields of cells in an anatom-  
1099 ically defined region of the superior temporal sulcus in the monkey. *Brain Res.*, 35(2):528–532.
- 1100 Dumoulin, S. O. and Wandell, B. A. (2008). Population receptive field estimates in human visual  
1101 cortex. *Neuroimage*, 39:647–660.
- 1102 Engel, S. A., Rumelhart, D. E., Wandell, B. A., Lee, A. T., Glover, G. H., Chichilnisky, E. J., and  
1103 Shadlen, M. N. (1994). fMRI of human visual cortex. *Nature*, 369:525.
- 1104 Fang, F. and He, S. (2005). Cortical responses to invisible objects in the human dorsal and ventral  
1105 pathways. *Nat. Neurosci.*, 8:1380–1385.
- 1106 Feinberg, D. A., Moeller, S., Smith, S. M., Auerbach, E., Ramanna, S., Gunther, M., Glasser, M. F.,  
1107 Miller, K. L., Ugurbil, K., and Yacoub, E. (2010). Multiplexed echo planar imaging for sub-second  
1108 whole brain fMRI and fast diffusion imaging. *PLoS One*, 5(12):e15710.
- 1109 Felleman, D. J. and Van Essen, D. C. (1991). Distributed hierarchical processing in the primate  
1110 cerebral cortex. *Cereb. Cortex*, 1(1):1–47.

- 1111 Ferizi, U., Scherrer, B., Schneider, T., Alipoor, M., Eufrazio, O., Fick, R. H. J., Deriche, R., Nilsson,  
1112 M., Loya-Olivas, A. K., Rivera, M., Poot, D. H. J., Ramirez-Manzanares, A., Marroquin, J. L.,  
1113 Rokem, A., Pötter, C., Dougherty, R. F., Sakaie, K., Wheeler-Kingshott, C., Warfield, S. K.,  
1114 Witzel, T., Wald, L. L., Raya, J. G., and Alexander, D. C. (2016). Diffusion MRI microstructure  
1115 models with in vivo human brain connectom data: results from a multi-group comparison.
- 1116 Ffytche, D. H., Guy, C. N., and Zeki, S. (1996). Motion specific responses from a blind hemifield.  
1117 *Brain*, 119 ( Pt 6):1971–1982.
- 1118 Fick, R. H. J., Wassermann, D., Caruyer, E., and Deriche, R. (2016). MAPL: Tissue microstructure  
1119 estimation using laplacian-regularized MAP-MRI and its application to HCP data. *Neuroimage*,  
1120 134:365–385.
- 1121 Fields, R. D. (2004). The other half of the brain. *Sci. Am.*, 290(4):54–61.
- 1122 Fields, R. D. (2008a). White matter in learning, cognition and psychiatric disorders. *Trends Neu-*  
1123 *rosci.*, 31(7):361–370.
- 1124 Fields, R. D. (2008b). White matter matters. *Sci. Am.*, 298(3):42–49.
- 1125 Fields, R. D. (2013). Neuroscience: Map the other brain. *Nature*, 501(7465):25–27.
- 1126 Fischer, E., Bulthoff, H. H., Logothetis, N. K., and Bartels, A. (2012). Human areas V3A and V6  
1127 compensate for self-induced planar visual motion. *Neuron*, 73:1228–1240.
- 1128 Fischl, B. (2012). FreeSurfer. *Neuroimage*, 62(2):774–781.
- 1129 Fox, C. J., Iaria, G., and Barton, J. J. S. (2008). Disconnection in prosopagnosia and face pro-  
1130 cessing. *Cortex*, 44(8):996–1009.
- 1131 Frank, L. R. (2001). Anisotropy in high angular resolution diffusion-weighted MRI. *Magn. Reson.*  
1132 *Med.*, 45(6):935–939.
- 1133 Frank, L. R. (2002). Characterization of anisotropy in high angular resolution diffusion-weighted  
1134 MRI. *Magn. Reson. Med.*, 47(6):1083–1099.
- 1135 Freeman, J. (2015). Open source tools for large-scale neuroscience. *Curr. Opin. Neurobiol.*,  
1136 32:156–163.
- 1137 Garyfallidis, E., Brett, M., Amirbekian, B., Rokem, A., van der Walt, S., Descoteaux, M., Nimmo-  
1138 Smith, I., and Dipy Contributors (2014). Dipy, a library for the analysis of diffusion MRI data.  
1139 *Front. Neuroinform.*, 8:8.
- 1140 Garyfallidis, E., Brett, M., Correia, M. M., Williams, G. B., and Nimmo-Smith, I. (2012). QuickBun-  
1141 dles, a method for tractography simplification. *Front. Neurosci.*, 6:175.
- 1142 Garyfallidis, E., Ocegueda, O., Wassermann, D., and Descoteaux, M. (2015). Robust and efficient  
1143 linear registration of white-matter fascicles in the space of streamlines. *Neuroimage*, 117:124–  
1144 140.
- 1145 Genç, E., Bergmann, J., Tong, F., Blake, R., Singer, W., and Kohler, A. (2011). Callosal connec-  
1146 tions of primary visual cortex predict the spatial spreading of binocular rivalry across the visual  
1147 hemifields. *Front. Hum. Neurosci.*, 5:161.

- 1148 Geschwind, N. (1965). Disconnexion syndromes in animals and man. *Brain*, 88(2):237–237.
- 1149 Gloor, P. (1997). *The temporal lobe and limbic system*. Oxford University Press, USA.
- 1150 Gobbini, M. I. and Haxby, J. V. (2007). Neural systems for recognition of familiar faces. *Neuropsychologia*, 45(1):32–41.
- 1152 Goga, C. and Türe, U. (2015). The anatomy of meyer’s loop revisited: changing the anatomical  
1153 paradigm of the temporal loop based on evidence from fiber microdissection. *J. Neurosurg.*,  
1154 122(6):1253–1262.
- 1155 Goldreich, D. and Kanics, I. M. (2003). Tactile acuity is enhanced in blindness. *J. Neurosci.*,  
1156 23(8):3439–3445.
- 1157 Gomez, J., Pestilli, F., Witthoft, N., Golarai, G., Liberman, A., Poltoratski, S., Yoon, J., and Grill-  
1158 Spector, K. (2015). Functionally defined white matter reveals segregated pathways in human  
1159 ventral temporal cortex associated with category-specific processing. *Neuron*, 85(1):216–227.
- 1160 Goncalves, N. R., Ban, H., Sanchez-Panchuelo, R. M., Francis, S. T., Schluppeck, D., and Welch-  
1161 man, A. E. (2015). 7 tesla fMRI reveals systematic functional organization for binocular disparity  
1162 in dorsal visual cortex. *J. Neurosci.*, 35:3056–3072.
- 1163 Gorgolewski, K. J. and Poldrack, R. (2016). A practical guide for improving transparency and  
1164 reproducibility in neuroimaging research.
- 1165 Gougoux, F., Lepore, F., Lassonde, M., Voss, P., Zatorre, R. J., and Belin, P. (2004). Neuropsychology:  
1166 pitch discrimination in the early blind. *Nature*, 430(6997):309.
- 1167 Green, D. M. and Swets, J. A. (1966). *Signal Detection Theory and Psychophysics*.
- 1168 Greenberg, A. S., Verstynen, T., Chiu, Y. C., Yantis, S., Schneider, W., and Behrmann, M. (2012).  
1169 Visuotopic cortical connectivity underlying attention revealed with white-matter tractography. *J.*  
1170 *Neurosci.*, 32:2773–2782.
- 1171 Grill-Spector, K., Kushnir, T., Edelman, S., Itzhak, Y., and Malach, R. (1998). Cue-invariant  
1172 activation in object-related areas of the human occipital lobe. *Neuron*, 21:191–202.
- 1173 Grill-Spector, K., Kushnir, T., Hendler, T., and Malach, R. (2000). The dynamics of object-selective  
1174 activation correlate with recognition performance in humans. *Nat. Neurosci.*, 3:837–843.
- 1175 Grossi, D., Soricelli, A., Ponari, M., Salvatore, E., Quarantelli, M., Prinster, A., and Trojano, L.  
1176 (2014). Structural connectivity in a single case of progressive prosopagnosia: the role of the  
1177 right inferior longitudinal fasciculus. *Cortex*, 56:111–120.
- 1178 Gschwind, M., Pourtois, G., Schwartz, S., Van De Ville, D., and Vuilleumier, P. (2012). White-matter  
1179 connectivity between face-responsive regions in the human brain. *Cereb. Cortex*, 22(7):1564–  
1180 1576.
- 1181 Hara, Y., Pestilli, F., and Gardner, J. L. (2014). Differing effects of attention in single-units and pop-  
1182 ulations are well predicted by heterogeneous tuning and the normalization model of attention.  
1183 *Front. Comput. Neurosci.*, 8:12.
- 1184 Hartline, D. K. and Colman, D. R. (2007). Rapid conduction and the evolution of giant axons and  
1185 myelinated fibers. *Curr. Biol.*, 17(1):R29–35.

- 1186 Henschen, S. E. (1893). On the visual path and centre. *Brain*, 16(1-2):170–180.
- 1187 Hofstetter, S., Tavor, I., Moryosef, S. T., and Assaf, Y. (2013). Short-term learning induces white  
1188 matter plasticity in the fornix. *J. Neurosci.*, 33(31):12844–12850.
- 1189 Holmes, G. and Lister, W. T. (1916). Disturbances of vision from cerebral lesions with special  
1190 reference to the cortical representation of the macula. *Brain*, 39(1-2):34–73.
- 1191 Huk, A. C. and Heeger, D. J. (2002). Pattern-motion responses in human visual cortex. *Nat.*  
1192 *Neurosci.*, 5(1):72–75.
- 1193 Innocenti, G. M. and Price, D. J. (2005). Exuberance in the development of cortical networks. *Nat.*  
1194 *Rev. Neurosci.*, 6(12):955–965.
- 1195 Inouye, T. (1909). *Die Sehstroungen bei Schussverietzungen der kortikalen Sehspahre*. W. En-  
1196 gelmann, Leipzig, Germany.
- 1197 James, T. W., Humphrey, G. K., Gati, J. S., Menon, R. S., and Goodale, M. A. (2002). Differential  
1198 effects of viewpoint on object-driven activation in dorsal and ventral streams. *Neuron*, 35:793–  
1199 801.
- 1200 Jbabdi, S., Saad, J., Sotiropoulos, S. N., Haber, S. N., Van Essen, D. C., and Behrens, T. E. (2015).  
1201 Measuring macroscopic brain connections in vivo. *Nat. Neurosci.*, 18(11):1546–1555.
- 1202 Jelescu, I. O., Veraart, J., Fieremans, E., and Novikov, D. S. (2016). Degeneracy in model parame-  
1203 ter estimation for multi-compartmental diffusion in neuronal tissue. *NMR Biomed.*, 29(1):33–47.
- 1204 Jensen, J. H. and Helpert, J. A. (2010). MRI quantification of non-gaussian water diffusion by  
1205 kurtosis analysis. *NMR Biomed.*, 23(7):698–710.
- 1206 Jensen, J. H., Helpert, J. A., Ramani, A., Lu, H., and Kaczynski, K. (2005). Diffusional kurtosis  
1207 imaging: the quantification of non-gaussian water diffusion by means of magnetic resonance  
1208 imaging. *Magn. Reson. Med.*, 53(6):1432–1440.
- 1209 Jeurissen, B., Leemans, A., Tournier, J.-D., Jones, D. K., and Sijbers, J. (2013). Investigating  
1210 the prevalence of complex fiber configurations in white matter tissue with diffusion magnetic  
1211 resonance imaging. *Hum. Brain Mapp.*, 34(11):2747–2766.
- 1212 Jiang, F., Stecker, G. C., and Fine, I. (2014). Auditory motion processing after early blindness. *J.*  
1213 *Vis.*, 14(13):4.
- 1214 Johansen-Berg, H. and Behrens, T. E. J. (2009). *Diffusion MRI*. Academic Press.
- 1215 Jones, D. K. (2004). The effect of gradient sampling schemes on measures derived from diffusion  
1216 tensor MRI: A monte carlo study. *Magn. Reson. Med.*, 51(4):807–815.
- 1217 Jones, D. K., Knösche, T. R., and Turner, R. (2013). White matter integrity, fiber count, and other  
1218 fallacies: the do's and don'ts of diffusion MRI. *Neuroimage*, 73:239–254.
- 1219 Kammen, A., Law, M., Tjan, B. S., Toga, A. W., and Shi, Y. (2015). Automated retinofugal vi-  
1220 sual pathway reconstruction with multi-shell HARDI and FOD-based analysis. *Neuroimage*,  
1221 125:767–779.

- 1222 Kim, J. H., Renden, R., and von Gersdorff, H. (2013). Dysmyelination of auditory afferent axons increases the jitter of action potential timing during high-frequency firing. *J. Neurosci.*,  
1223 33(22):9402–9407.  
1224
- 1225 Kim, M., Ducros, M., Carlson, T., Ronen, I., He, S., Ugurbil, K., and Kim, D.-S. (2006). Anatomical  
1226 correlates of the functional organization in the human occipitotemporal cortex. *Magn. Reson.*  
1227 *Imaging*, 24(5):583–590.
- 1228 Kolster, H., Janssens, T., Orban, G. A., and Vanduffel, W. (2014). The retinotopic organization of  
1229 macaque occipitotemporal cortex anterior to V4 and caudoventral to the middle temporal (MT)  
1230 cluster. *J. Neurosci.*, 34(31):10168–10191.
- 1231 Kolster, H., Mandeville, J. B., Arsenault, J. T., Ekstrom, L. B., Wald, L. L., and Vanduffel, W. (2009).  
1232 Visual field map clusters in macaque extrastriate visual cortex. *J. Neurosci.*, 29(21):7031–7039.
- 1233 Konen, C. S. and Kastner, S. (2008). Two hierarchically organized neural systems for object  
1234 information in human visual cortex. *Nat. Neurosci.*, 11:224–231.
- 1235 Larsson, J. and Heeger, D. J. (2006). Two retinotopic visual areas in human lateral occipital cortex.  
1236 *J. Neurosci.*, 26:13128–13142.
- 1237 Lashley, K. S. (1963). *Brain mechanisms and learning*. New York: Dover.
- 1238 Le Bihan, D. and Lima, M. (2015). Diffusion magnetic resonance imaging: What water tells us  
1239 about biological tissues. *PLoS Biol.*, 13(7):e1002203.
- 1240 Lebel, C. and Beaulieu, C. (2011). Longitudinal development of human brain wiring continues from  
1241 childhood into adulthood. *J. Neurosci.*, 31(30):10937–10947.
- 1242 Lebel, C., Gee, M., Camicioli, R., Wieler, M., Martin, W., and Beaulieu, C. (2012). Diffusion tensor  
1243 imaging of white matter tract evolution over the lifespan. *Neuroimage*, 60(1):340–352.
- 1244 Leh, S. E., Johansen-Berg, H., and Ptito, A. (2006). Unconscious vision: new insights into the  
1245 neuronal correlate of blindsight using diffusion tractography. *Brain*, 129(Pt 7):1822–1832.
- 1246 Leong, J. K., Pestilli, F., Wu, C. C., Samanez-Larkin, G. R., and Knutson, B. (2016). White-Matter  
1247 tract connecting anterior insula to nucleus accumbens correlates with reduced preference for  
1248 positively skewed gambles. *Neuron*, 89(1):63–69.
- 1249 Leporé, N., Voss, P., Lepore, F., Chou, Y.-Y., Fortin, M., Gougoux, F., Lee, A. D., Brun, C., Las-  
1250 sonde, M., Madsen, S. K., Toga, A. W., and Thompson, P. M. (2010). Brain structure changes  
1251 visualized in early- and late-onset blind subjects. *Neuroimage*, 49(1):134–140.
- 1252 Lessard, N., Paré, M., Lepore, F., and Lassonde, M. (1998). Early-blind human subjects localize  
1253 sound sources better than sighted subjects. *Nature*, 395(6699):278–280.
- 1254 Leuze, C. W. U., Anwander, A., Bazin, P.-L., Dhital, B., Stüber, C., Reimann, K., Geyer, S., and  
1255 Turner, R. (2014). Layer-specific intracortical connectivity revealed with diffusion MRI. *Cereb.*  
1256 *Cortex*, 24(2):328–339.
- 1257 Lewis, L. B. and Fine, I. (2011). The effects of visual deprivation after infancy. In *Adler's Physiology*  
1258 *of the Eye*, pages 750–766. Elsevier.



- 1259 Mangin, J.-F., Fillard, P., Cointepas, Y., Le Bihan, D., Frouin, V., and Poupon, C. (2013). Toward  
1260 global tractography. *Neuroimage*, 80:290–296.
- 1261 Martino, J. and Garcia-Porrero, J. A. (2013). In reply: Wernicke’s perpendicular fasciculus and  
1262 vertical portion of the superior longitudinal fasciculus. *Neurosurgery*.
- 1263 Maunsell, J. H. and Gibson, J. R. (1992). Visual response latencies in striate cortex of the macaque  
1264 monkey. *J. Neurophysiol.*, 68(4):1332–1344.
- 1265 McNutt, M. (2014). Reproducibility. *Science*, 343(6168):229–229.
- 1266 Melbourne, A., Toussaint, N., Owen, D., Simpson, I., Anthopoulos, T., De Vita, E., Atkinson, D.,  
1267 and Ourselin, S. (2016). NiftyFit: a software package for multi-parametric Model-Fitting of 4D  
1268 magnetic resonance imaging data. *Neuroinformatics*.
- 1269 Mezer, A., Yeatman, J. D., Stikov, N., Kay, K. N., Cho, N.-J., Dougherty, R. F., Perry, M. L., Parvizi,  
1270 J., Hua, L. H., Butts-Pauly, K., and Wandell, B. A. (2013). Quantifying the local tissue volume  
1271 and composition in individual brains with magnetic resonance imaging. *Nat. Med.*, 19(12):1667–  
1272 1672.
- 1273 Millman, J. K. and Brett, M. (2007). Analysis of functional magnetic resonance imaging in python.  
1274 *Comput. Sci. Eng.*, 9(3):52–55.
- 1275 Milner, A. D. and Goodale, M. A. (1995). *The visual brain in action*, volume 27. England.
- 1276 Mohammadi, S., Carey, D., Dick, F., Diedrichsen, J., Sereno, M. I., Reisert, M., Callaghan, M. F.,  
1277 and Weiskopf, N. (2015). Whole-Brain in-vivo measurements of the axonal G-Ratio in a group  
1278 of 37 healthy volunteers. *Front. Neurosci.*, 9.
- 1279 Mori, S., Crain, B. J., Chacko, V. P., and van Zijl, P. C. (1999). Three-dimensional tracking of axonal  
1280 projections in the brain by magnetic resonance imaging. *Ann. Neurol.*, 45(2):265–269.
- 1281 Mori, S. and Van Zijl, P. C. M. (2002). Fiber tracking: principles and strategies-a technical review.  
1282 *NMR Biomed.*, 15(7-8):468–480.
- 1283 Morland, A. B., Jones, S. R., Finlay, A. L., Deyzac, E., Lê, S., and Kemp, S. (1999). Visual  
1284 perception of motion, luminance and colour in a human hemianope. *Brain*, 122 ( Pt 6):1183–  
1285 1198.
- 1286 Movshon, J. A., Adelson, E. H., Gizzi, M. S., and Newsome, W. T. (1985). The analysis of moving  
1287 visual patterns. *Pattern recognition mechanisms*, 54:117–151.
- 1288 Movshon, J. A. and Van Sluyters, R. C. (1981). Visual neural development. *Annu. Rev. Psychol.*,  
1289 32:477–522.
- 1290 Mukherjee, P. (2005). Diffusion tensor imaging and fiber tractography in acute stroke. *Neuroimag-*  
1291 *ing Clin. N. Am.*, 15(3):655–65, xii.
- 1292 Mulkern, R. V., Gudbjartsson, H., Westin, C. F., Zengingonul, H. P., Gartner, W., Guttman,  
1293 C. R., Robertson, R. L., Kyriakos, W., Schwartz, R., Holtzman, D., Jolesz, F. A., and Maier,  
1294 S. E. (1999). Multi-component apparent diffusion coefficients in human brain. *NMR Biomed.*,  
1295 12(1):51–62.

- 1296 Nishida, S., Sasaki, Y., Murakami, I., Watanabe, T., and Tootell, R. B. H. (2003). Neuroimaging of  
1297 direction-selective mechanisms for second-order motion. *J. Neurophysiol.*, 90(5):3242–3254.
- 1298 Nooner, K. B., Colcombe, S. J., Tobe, R. H., Mennes, M., Benedict, M. M., Moreno, A. L., Panek,  
1299 L. J., Brown, S., Zavitz, S. T., Li, Q., Sikka, S., Gutman, D., Bangaru, S., Schlachter, R. T.,  
1300 Kamiel, S. M., Anwar, A. R., Hinz, C. M., Kaplan, M. S., Rachlin, A. B., Adelsberg, S., Cheung,  
1301 B., Khanuja, R., Yan, C., Craddock, C. C., Calhoun, V., Courtney, W., King, M., Wood, D., Cox,  
1302 C. L., Kelly, A. M. C., Di Martino, A., Petkova, E., Reiss, P. T., Duan, N., Thomsen, D., Biswal, B.,  
1303 Coffey, B., Hoptman, M. J., Javitt, D. C., Pomara, N., Sidtis, J. J., Koplewicz, H. S., Castellanos,  
1304 F. X., Leventhal, B. L., and Milham, M. P. (2012). The NKI-Rockland sample: A model for  
1305 accelerating the pace of discovery science in psychiatry. *Front. Neurosci.*, 6:152.
- 1306 Noppeney, U., Friston, K. J., Ashburner, J., Frackowiak, R., and Price, C. J. (2005). Early visual  
1307 deprivation induces structural plasticity in gray and white matter. *Curr. Biol.*, 15(13):R488–90.
- 1308 Ochsner, K. N. and Kosslyn, S. M. (1999). The cognitive neuroscience approach. In Bly, B. M. and  
1309 Rumelhart, D. E., editors, *Handbook of Perception and Cognition; Cognitive Science*, volume 10,  
1310 pages 319–365. books.google.com.
- 1311 Ogawa, S., Takemura, H., Horiguchi, H., Terao, M., Haji, T., Pestilli, F., Yeatman, J. D., Tsuneoka,  
1312 H., Wandell, B. A., and Masuda, Y. (2014). White matter consequences of retinal receptor and  
1313 ganglion cell damage. *Invest. Ophthalmol. Vis. Sci.*, 55(10):6976–6986.
- 1314 Özarlan, E., Koay, C. G., and Basser, P. J. (2013). Simple harmonic oscillator based recon-  
1315 struction and estimation for One-Dimensional q-space magnetic resonance (1D-SHORE). In  
1316 *Excursions in Harmonic Analysis, Volume 2*, Applied and Numerical Harmonic Analysis, pages  
1317 373–399. Birkhäuser Boston.
- 1318 Peltier, J., Travers, N., Destrieux, C., and Velut, S. (2006). Optic radiations: a microsurgical  
1319 anatomical study. *J. Neurosurg.*, 105(2):294–300.
- 1320 Perez, F., Granger, B. E., and Hunter, J. D. (2010). Python: An ecosystem for scientific computing.  
1321 *Comput. Sci. Eng.*, 13(2):13–21.
- 1322 Pestilli, F., Carrasco, M., Heeger, D. J., and Gardner, J. L. (2011). Attentional enhancement via  
1323 selection and pooling of early sensory responses in human visual cortex. *Neuron*, 72(5):832–  
1324 846.
- 1325 Pestilli, F. and Franco, P. (2015). Test-retest measurements and digital validation for in vivo neuro-  
1326 science. *Scientific Data*, 2:140057.
- 1327 Pestilli, F., Franco, P., Yeatman, J. D., Ariel, R., Kay, K. N., and Wandell, B. A. (2014). Evaluation  
1328 and statistical inference for human connectomes. *Nat. Methods*, 11(10):1058–1063.
- 1329 Petersen, S. E. and Sporns, O. (2015). Brain networks and cognitive architectures. *Neuron*,  
1330 88(1):207–219.
- 1331 Philippi, C. L., Mehta, S., Grabowski, T., Adolphs, R., and Rudrauf, D. (2009). Damage to as-  
1332 sociation fiber tracts impairs recognition of the facial expression of emotion. *J. Neurosci.*,  
1333 29(48):15089–15099.
- 1334 Pierpaoli, C. and Basser, P. J. (1996). Toward a quantitative assessment of diffusion anisotropy.  
1335 *Magn. Reson. Med.*, 36(6):893–906.

- 1336 Poppel, E., Held, R., and Frost, D. (1973). Leter: Residual visual function after brain wounds  
1337 involving the central visual pathways in man. *Nature*, 243(5405):295–296.
- 1338 Portegies, J. M., Fick, R. H. J., Sanguinetti, G. R., Meesters, S. P. L., Girard, G., and Duits, R.  
1339 (2015). Improving fiber alignment in HARDI by combining contextual PDE flow with constrained  
1340 spherical deconvolution. *PLoS One*, 10(10):e0138122.
- 1341 Press, W. A., Brewer, A. A., Dougherty, R. F., Wade, A. R., and Wandell, B. A. (2001). Visual areas  
1342 and spatial summation in human visual cortex. *Vision Res.*, 41:1321–1332.
- 1343 Ptito, M., Schneider, F. C. G., Paulson, O. B., and Kupers, R. (2008). Alterations of the visual  
1344 pathways in congenital blindness. *Exp. Brain Res.*, 187(1):41–49.
- 1345 Reid, R. C. (2012). From functional architecture to functional connectomics. *Neuron*, 75(2):209–  
1346 217.
- 1347 Reisert, M., Mader, I., Anastasopoulos, C., Weigel, M., Schnell, S., and Kiselev, V. (2011). Global  
1348 fiber reconstruction becomes practical. *Neuroimage*, 54(2):955–962.
- 1349 Reisle, N. L., Kupers, R., Siebner, H. R., Ptito, M., and Dyrby, T. B. (2015). Blindness alters the  
1350 microstructure of the ventral but not the dorsal visual stream. *Brain Struct. Funct.*
- 1351 Restrepo, C. E., Manger, P. R., Spenger, C., and Innocenti, G. M. (2003). Immature cortex lesions  
1352 alter retinotopic maps and interhemispheric connections. *Ann. Neurol.*, 54(1):51–65.
- 1353 Reveley, C., Seth, A. K., Pierpaoli, C., Silva, A. C., Yu, D., Saunders, R. C., Leopold, D. A., and  
1354 Ye, F. Q. (2015). Superficial white matter fiber systems impede detection of long-range cortical  
1355 connections in diffusion MR tractography. *Proc. Natl. Acad. Sci. U. S. A.*, 112(21):E2820–8.
- 1356 Robel, S. and Sontheimer, H. (2016). Glia as drivers of abnormal neuronal activity. *Nat. Neurosci.*,  
1357 19(1):28–33.
- 1358 Röder, B., Stock, O., Bien, S., Neville, H., and Rösler, F. (2002). Speech processing activates  
1359 visual cortex in congenitally blind humans. *Eur. J. Neurosci.*, 16(5):930–936.
- 1360 Röder, B., Teder-Sälejärvi, W., Sterr, A., Rösler, F., Hillyard, S. A., and Neville, H. J. (1999).  
1361 Improved auditory spatial tuning in blind humans. *Nature*, 400(6740):162–166.
- 1362 Rokem, A., Yeatman, J. D., Pestilli, F., Kay, K. N., Mezer, A., van der Walt, S., and Wandell,  
1363 B. A. (2015). Evaluating the accuracy of diffusion MRI models in white matter. *PLoS One*,  
1364 10(4):e0123272.
- 1365 Rubinov, M., Kötter, R., Hagmann, P., and Sporns, O. (2009). Brain connectivity toolbox: a collec-  
1366 tion of complex network measurements and brain connectivity datasets. *Neuroimage*, 47:S169.
- 1367 Rudrauf, D., David, O., Lachaux, J.-P., Kovach, C. K., Martinerie, J., Renault, B., and Damasio,  
1368 A. (2008). Rapid interactions between the ventral visual stream and emotion-related structures  
1369 rely on a two-pathway architecture. *J. Neurosci.*, 28(11):2793–2803.
- 1370 Sachs, H. (1892). *Das hemisphärenmark des menschlichen grosshirns*. Verlag von georg thieme,  
1371 Leipzig.

- 1372 Sadato, N., Pascual-Leone, A., Grafman, J., Ibañez, V., Deiber, M. P., Dold, G., and Hallett, M.  
1373 (1996). Activation of the primary visual cortex by braille reading in blind subjects. *Nature*,  
1374 380(6574):526–528.
- 1375 Saenz, M. and Fine, I. (2010). Topographic organization of V1 projections through the corpus  
1376 callosum in humans. *Neuroimage*, 52:1224–1229.
- 1377 Sagi, Y., Tavor, I., Hofstetter, S., Tzur-Moryosef, S., Blumenfeld-Katzir, T., and Assaf, Y. (2012).  
1378 Learning in the fast lane: new insights into neuroplasticity. *Neuron*, 73(6):1195–1203.
- 1379 Salthouse, T. A. (2004). What and when of cognitive aging. *Curr. Dir. Psychol. Sci.*, 13(4):140–144.
- 1380 Sampaio-Baptista, C., Khrapitchev, A. A., Foxley, S., Schlagheck, T., Scholz, J., Jbabdi, S.,  
1381 DeLuca, G. C., Miller, K. L., Taylor, A., Thomas, N., Kleim, J., Sibson, N. R., Bannerman, D., and  
1382 Johansen-Berg, H. (2013). Motor skill learning induces changes in white matter microstructure  
1383 and myelination. *J. Neurosci.*, 33(50):19499–19503.
- 1384 Scherf, K. S., Thomas, C., Doyle, J., and Behrmann, M. (2014). Emerging Structure–Function  
1385 relations in the developing face processing system. *Cereb. Cortex*, 24(11):2964–2980.
- 1386 Sereno, M. I., Dale, A. M., Reppas, J. B., Kwong, K. K., Belliveau, J. W., Brady, T. J., Rosen, B. R.,  
1387 and Tootell, R. B. (1995). Borders of multiple visual areas in humans revealed by functional  
1388 magnetic resonance imaging. *Science*, 268:889–893.
- 1389 Sereno, M. I., Lutti, A., Weiskopf, N., and Dick, F. (2013). Mapping the human cortical surface by  
1390 combining quantitative t(1) with retinotopy. *Cereb. Cortex*, 23(9):2261–2268.
- 1391 Setsompop, K., Kimmlingen, R., Eberlein, E., Witzel, T., Cohen-Adad, J., McNab, J. A., Keil, B.,  
1392 Tisdall, M. D., Hoecht, P., Dietz, P., Cauley, S. F., Tountcheva, V., Matschl, V., Lenz, V. H.,  
1393 Heberlein, K., Potthast, A., Thein, H., Van Horn, J., Toga, A., Schmitt, F., Lehne, D., Rosen,  
1394 B. R., Wedeen, V., and Wald, L. L. (2013). Pushing the limits of in vivo diffusion MRI for the  
1395 human connectome project. *Neuroimage*, 80:220–233.
- 1396 Sherbondy, A. J., Dougherty, R. F., Ben-Shachar, M., Napel, S., and Wandell, B. A. (2008a).  
1397 ConTrack: finding the most likely pathways between brain regions using diffusion tractography.  
1398 *J. Vis.*, 8(9):15.1–16.
- 1399 Sherbondy, A. J., Dougherty, R. F., Napel, S., and Wandell, B. A. (2008b). Identifying the human  
1400 optic radiation using diffusion imaging and fiber tractography. *J. Vis.*, 8(10):12.1–11.
- 1401 Shimony, J. S., Burton, H., Epstein, A. A., McLaren, D. G., Sun, S. W., and Snyder, A. Z. (2006).  
1402 Diffusion tensor imaging reveals white matter reorganization in early blind humans. *Cereb.*  
1403 *Cortex*, 16(11):1653–1661.
- 1404 Shu, N., Liu, Y., Li, J., Li, Y., Yu, C., and Jiang, T. (2009). Altered anatomical network in early  
1405 blindness revealed by diffusion tensor tractography. *PLoS One*, 4(9):e7228.
- 1406 Silver, M. A. and Kastner, S. (2009). Topographic maps in human frontal and parietal cortex.  
1407 *Trends Cogn. Sci.*, 13(11):488–495.
- 1408 Simmons, D. M. and Swanson, L. W. (2009). Comparing histological data from different brains:  
1409 sources of error and strategies for minimizing them. *Brain Res. Rev.*, 60(2):349–367.

- 1410 Smith, A. T., Greenlee, M. W., Singh, K. D., Kraemer, F. M., and Hennig, J. (1998). The process-  
1411 ing of first- and second-order motion in human visual cortex assessed by functional magnetic  
1412 resonance imaging (fMRI). *J. Neurosci.*, 18:3816–3830.
- 1413 Smith, R. E., Tournier, J.-D., Calamante, F., and Connelly, A. (2012). Anatomically-constrained  
1414 tractography: improved diffusion MRI streamlines tractography through effective use of anatom-  
1415 ical information. *Neuroimage*, 62(3):1924–1938.
- 1416 Smith, R. E., Tournier, J.-D., Calamante, F., and Connelly, A. (2015). The effects of SIFT on the  
1417 reproducibility and biological accuracy of the structural connectome. *Neuroimage*, 104:253–265.
- 1418 Smith, S. M., Jenkinson, M., Woolrich, M. W., Beckmann, C. F., Behrens, T. E. J., Johansen-  
1419 Berg, H., Bannister, P. R., De Luca, M., Drobnjak, I., Flitney, D. E., Niazy, R. K., Saunders, J.,  
1420 Vickers, J., Zhang, Y., De Stefano, N., Brady, J. M., and Matthews, P. M. (2004). Advances in  
1421 functional and structural MR image analysis and implementation as FSL. *Neuroimage*, 23 Suppl  
1422 1:S208–19.
- 1423 Song, S., Garrido, L., Nagy, Z., Mohammadi, S., Steel, A., Driver, J., Dolan, R. J., Duchaine, B.,  
1424 and Furl, N. (2015). Local but not long-range microstructural differences of the ventral temporal  
1425 cortex in developmental prosopagnosia. *Neuropsychologia*, 78:195–206.
- 1426 Song, S.-K., Yoshino, J., Le, T. Q., Lin, S.-J., Sun, S.-W., Cross, A. H., and Armstrong, R. C.  
1427 (2005). Demyelination increases radial diffusivity in corpus callosum of mouse brain. *Neuroim-  
1428 age*, 26(1):132–140.
- 1429 Sotiropoulos, S. N., Jbabdi, S., Xu, J., Andersson, J. L., Moeller, S., Auerbach, E. J., Glasser, M. F.,  
1430 Hernandez, M., Sapiro, G., Jenkinson, M., Feinberg, D. A., Yacoub, E., Lenglet, C., Van Essen,  
1431 D. C., Ugurbil, K., Behrens, T. E., and Consortium, W. U-Minn HCP (2013). Advances in diffusion  
1432 MRI acquisition and processing in the human connectome project. *Neuroimage*, 80:125–143.
- 1433 Sporns, O. (2013). Structure and function of complex brain networks. *Dialogues Clin. Neurosci.*,  
1434 15(3):247–262.
- 1435 Sporns, O., Tononi, G., and Kötter, R. (2005). The human connectome: A structural description of  
1436 the human brain. *PLoS Comput. Biol.*, 1(4):e42.
- 1437 Stikov, N., Campbell, J. S. W., Stroh, T., Lavelée, M., Frey, S., Novek, J., Nuara, S., Ho, M.-K.,  
1438 Bedell, B. J., Dougherty, R. F., Leppert, I. R., Boudreau, M., Narayanan, S., Duval, T., Cohen-  
1439 Adad, J., Picard, P.-A., Gasecka, A., Côté, D., and Pike, G. B. (2015). In vivo histology of the  
1440 myelin g-ratio with magnetic resonance imaging. *Neuroimage*, 118:397–405.
- 1441 Stikov, N., Perry, L. M., Mezer, A., Rykhlevskaia, E., Wandell, B. A., Pauly, J. M., and Dougherty,  
1442 R. F. (2011). Bound pool fractions complement diffusion measures to describe white matter  
1443 micro and macrostructure. *Neuroimage*, 54(2):1112–1121.
- 1444 Stodden, V., Leisch, F., and Peng, R. D. (2014). *Implementing Reproducible Research*. CRC  
1445 Press.
- 1446 Stüber, C., Morawski, M., Schäfer, A., Labadie, C., Wähnert, M., Leuze, C., Streicher, M., Barap-  
1447 atre, N., Reimann, K., Geyer, S., Spemann, D., and Turner, R. (2014). Myelin and iron concen-  
1448 tration in the human brain: a quantitative study of MRI contrast. *Neuroimage*, 93 Pt 1:95–106.

- 1449 Takemura, H., Caiafa, C. F., Wandell, B. A., and Pestilli, F. (2016). Ensemble tractography. *PLoS*  
1450 *Comput. Biol.*, 12(2):e1004692.
- 1451 Takemura, H., Rokem, A., Winawer, J., Yeatman, J. D., Wandell, B. A., and Pestilli, F. (2015). A  
1452 major human white matter pathway between dorsal and ventral visual cortex. *Cereb. Cortex*.
- 1453 Tamietto, M., Pullens, P., de Gelder, B., Weiskrantz, L., and Goebel, R. (2012). Subcortical con-  
1454 nections to human amygdala and changes following destruction of the visual cortex. *Curr. Biol.*,  
1455 22(15):1449–1455.
- 1456 Thomas, C., Avidan, G., Humphreys, K., Jung, K.-J., Gao, F., and Behrmann, M. (2009). Re-  
1457 duced structural connectivity in ventral visual cortex in congenital prosopagnosia. *Nat. Neu-*  
1458 *rosci.*, 12(1):29–31.
- 1459 Thomas, C. and Baker, C. I. (2013). Teaching an adult brain new tricks: a critical review of evidence  
1460 for training-dependent structural plasticity in humans. *Neuroimage*, 73:225–236.
- 1461 Thomas, C., Moya, L., Avidan, G., Humphreys, K., Jung, K. J., Peterson, M. A., and Behrmann,  
1462 M. (2008). Reduction in white matter connectivity, revealed by diffusion tensor imaging, may  
1463 account for age-related changes in face perception. *J. Cogn. Neurosci.*, 20(2):268–284.
- 1464 Thomas, C., Ye, F. Q., Irfanoglu, M. O., Modi, P., Saleem, K. S., Leopold, D. A., and Pierpaoli, C.  
1465 (2014). Anatomical accuracy of brain connections derived from diffusion MRI tractography is  
1466 inherently limited. *Proc. Natl. Acad. Sci. U. S. A.*, 111(46):16574–16579.
- 1467 Thomason, M. E. and Thompson, P. M. (2011). Diffusion imaging, white matter, and psychopathol-  
1468 ogy. *Annu. Rev. Clin. Psychol.*, 7:63–85.
- 1469 Tomaiuolo, F., Campana, S., Collins, D. L., Fonov, V. S., Ricciardi, E., Sartori, G., Pietrini, P.,  
1470 Kupers, R., and Ptito, M. (2014). Morphometric changes of the corpus callosum in congenital  
1471 blindness. *PLoS One*, 9(9):e107871.
- 1472 Tootell, R. B., Mendola, J. D., Hadjikhani, N. K., Ledden, P. J., Liu, A. K., Reppas, J. B., Sereno,  
1473 M. I., and Dale, A. M. (1997). Functional analysis of V3A and related areas in human visual  
1474 cortex. *J. Neurosci.*, 17:7060–7078.
- 1475 Tootell, R. B., Reppas, J. B., Kwong, K. K., Malach, R., Born, R. T., Brady, T. J., Rosen, B. R., and  
1476 Belliveau, J. W. (1995). Functional analysis of human MT and related visual cortical areas using  
1477 magnetic resonance imaging. *J. Neurosci.*, 15(4):3215–3230.
- 1478 Tournier, J.-D., Calamante, F., and Connelly, A. (2007). Robust determination of the fibre orienta-  
1479 tion distribution in diffusion MRI: non-negativity constrained super-resolved spherical deconvol-  
1480 ution. *Neuroimage*, 35(4):1459–1472.
- 1481 Tournier, J.-D., Calamante, F., and Connelly, A. (2012). MRtrix: Diffusion tractography in crossing  
1482 fiber regions. *Int. J. Imaging Syst. Technol.*, 22(1):53–66.
- 1483 Tournier, J.-D., Calamante, F., Gadian, D. G., and Connelly, A. (2004). Direct estimation of the fiber  
1484 orientation density function from diffusion-weighted MRI data using spherical deconvolution.  
1485 *Neuroimage*, 23(3):1176–1185.

- 1486 Tsao, D. Y., Vanduffel, W., Sasaki, Y., Fize, D., Knutsen, T. A., Mandeville, J. B., Wald, L. L., Dale,  
1487 A. M., Rosen, B. R., Van Essen, D. C., Livingstone, M. S., Orban, G. A., and Tootell, R. B.  
1488 (2003). Stereopsis activates V3A and caudal intraparietal areas in macaques and humans.  
1489 *Neuron*, 39:555–568.
- 1490 Tuch, D. S. (2004). Q-ball imaging. *Magn. Reson. Med.*, 52(6):1358–1372.
- 1491 Uhl, F., Franzen, P., Podreka, I., Steiner, M., and Deecke, L. (1993). Increased regional cerebral  
1492 blood flow in inferior occipital cortex and cerebellum of early blind humans. *Neurosci. Lett.*,  
1493 150(2):162–164.
- 1494 Ungerleider, L. G. and Haxby, J. V. (1994). 'what' and 'where' in the human brain. *Curr. Opin.*  
1495 *Neurobiol.*, 4:157–165.
- 1496 Ungerleider, L. G. and Mishkin, M. (1982). Two cortical visual systems. In Ingle, D. J., Goodale,  
1497 M. A., and Mansfield, R. J. W., editors, *The analysis of visual behavior.*, pages 549–586. MIT  
1498 Press, Cambridge, MA.
- 1499 Van Boven, R. W., Hamilton, R. H., Kauffman, T., Keenan, J. P., and Pascual-Leone, A. (2000).  
1500 Tactile spatial resolution in blind braille readers. *Neurology*, 54(12):2230–2236.
- 1501 Van Essen, D. C., Smith, S. M., Barch, D. M., Behrens, T. E. J., Yacoub, E., Ugurbil, K., and  
1502 WU-Minn HCP Consortium (2013). The WU-Minn human connectome project: an overview.  
1503 *Neuroimage*, 80:62–79.
- 1504 Vanduffel, W., Zhu, Q., and Orban, G. A. (2014). Monkey cortex through fMRI glasses. *Neuron*,  
1505 83(3):533–550.
- 1506 Veenith, T. V., Carter, E., Grossac, J., Newcombe, V. F. J., Outtrim, J. G., Lupson, V., Williams,  
1507 G. B., Menon, D. K., and Coles, J. P. (2013). Inter subject variability and reproducibility of diffu-  
1508 sion tensor imaging within and between different imaging sessions. *PLoS One*, 8(6):e65941.
- 1509 Vidyasagar, T. R. and Pammer, K. (2010). Dyslexia: a deficit in visuo-spatial attention, not in  
1510 phonological processing. *Trends Cogn. Sci.*, 14(2):57–63.
- 1511 Voss, P., Lassonde, M., Gougoux, F., Fortin, M., Guillemot, J.-P., and Lepore, F. (2004). Early-  
1512 and late-onset blind individuals show supra-normal auditory abilities in far-space. *Curr. Biol.*,  
1513 14(19):1734–1738.
- 1514 Vu, A. T., Auerbach, E., Lenglet, C., Moeller, S., Sotiropoulos, S. N., Jbabdi, S., Andersson, J.,  
1515 Yacoub, E., and Ugurbil, K. (2015). High resolution whole brain diffusion imaging at 7T for the  
1516 human connectome project. *Neuroimage*, 122:318–331.
- 1517 Wade, A. R., Brewer, A. A., Rieger, J. W., and Wandell, B. A. (2002). Functional measurements of  
1518 human ventral occipital cortex: retinotopy and colour. *Philos. Trans. R. Soc. Lond. B Biol. Sci.*,  
1519 357:963–973.
- 1520 Wakana, S., Caprihan, A., Panzenboeck, M. M., Fallon, J. H., Perry, M., Gollub, R. L., Hua, K.,  
1521 Zhang, J., Jiang, H., Dubey, P., Blitz, A., van Zijl, P., and Mori, S. (2007). Reproducibility of  
1522 quantitative tractography methods applied to cerebral white matter. *Neuroimage*, 36(3):630–  
1523 644.
- 1524 Wandell, B. A. (2016). Clarifying human white matter. *Annu. Rev. Neurosci.*, 39(1).

- 1525 Wandell, B. A., Dumoulin, S. O., and Brewer, A. A. (2007). Visual field maps in human cortex.  
1526 *Neuron*, 56(2):366–383.
- 1527 Wandell, B. A., Rokem, A., Perry, L. M., Schaefer, G., and Dougherty, R. F. (2015). Data manage-  
1528 ment to support reproducible research.
- 1529 Wandell, B. A. and Winawer, J. (2011). Imaging retinotopic maps in the human brain. *Vision Res.*,  
1530 51(7):718–737.
- 1531 Wang, D., Qin, W., Liu, Y., Zhang, Y., Jiang, T., and Yu, C. (2013). Altered white matter integrity in  
1532 the congenital and late blind people. *Neural Plast.*, 2013:128236.
- 1533 Wassermann, D., Bloy, L., Kanterakis, E., Verma, R., and Deriche, R. (2010). Unsupervised white  
1534 matter fiber clustering and tract probability map generation: applications of a gaussian process  
1535 framework for white matter fibers. *Neuroimage*, 51(1):228–241.
- 1536 Watkins, K. E., Cowey, A., Alexander, I., Filippini, N., Kennedy, J. M., Smith, S. M., Ragge, N., and  
1537 Bridge, H. (2012). Language networks in anophthalmia: maintained hierarchy of processing in  
1538 'visual' cortex. *Brain*, 135(Pt 5):1566–1577.
- 1539 Watson, J. D., Myers, R., Frackowiak, R. S., Hajnal, J. V., Woods, R. P., Mazziotta, J. C., Shipp,  
1540 S., and Zeki, S. (1993). Area V5 of the human brain: evidence from a combined study using  
1541 positron emission tomography and magnetic resonance imaging. *Cereb. Cortex*, 3(2):79–94.
- 1542 Waxman, S. G. and Bennett, M. V. (1972). Relative conduction velocities of small myelinated and  
1543 non-myelinated fibres in the central nervous system. *Nat. New Biol.*, 238(85):217–219.
- 1544 Weaver, K. E., Richards, T. L., Saenz, M., Petropoulos, H., and Fine, I. (2013). Neurochemical  
1545 changes within human early blind occipital cortex. *Neuroscience*, 252:222–233.
- 1546 Webster, M. J., Ungerleider, L. G., and Bachevalier, J. (1991). Lesions of inferior temporal area  
1547 TE in infant monkeys alter cortico-amygdalar projections. *Neuroreport*, 2(12):769–772.
- 1548 Wedeen, V. J., Hagmann, P., Tseng, W.-Y. I., Reese, T. G., and Weisskoff, R. M. (2005). Mapping  
1549 complex tissue architecture with diffusion spectrum magnetic resonance imaging. *Magn. Reson.*  
1550 *Med.*, 54(6):1377–1386.
- 1551 Wedeen, V. J., Rosene, D. L., Wang, R., Dai, G., Mortazavi, F., Hagmann, P., Kaas, J. H.,  
1552 and Tseng, W.-Y. I. (2012a). The geometric structure of the brain fiber pathways. *Science*,  
1553 335(6076):1628–1634.
- 1554 Wedeen, V. J., Rosene, D. L., Wang, R., Dai, G., Mortazavi, F., Hagmann, P., Kaas, J. H., and  
1555 Tseng, W.-Y. I. (2012b). Response to comment on “the geometric structure of the brain fiber  
1556 pathways”. *Science*, 337(6102):1605.
- 1557 Weiner, K. S., Yeatman, J. D., and Wandell, B. A. (2016). The posterior arcuate fasciculus and the  
1558 vertical occipital fasciculus. *Cortex*.
- 1559 Weiskrantz, L., Warrington, E. K., Sanders, M. D., and Marshall, J. (1974). Visual capacity in the  
1560 hemianopic field following a restricted occipital ablation. *Brain*, 97(4):709–728.
- 1561 Wernicke, C. (1881). *Lehrbuch der Gehirnkrankheiten für Aerzte und Studirende*. Kassel Theodor  
1562 Fischer.



- 1563 Wiesel, T. N. and Hubel, D. H. (1963). Single-cell responses in striate cortex of kittens deprived of  
1564 vision in one eye. *J. Neurophysiol.*, 26:1003–1017.
- 1565 Wiesel, T. N. and Hubel, D. H. (1965a). Comparison of the effects of unilateral and bilateral eye  
1566 closure on cortical unit responses in kittens. *J. Neurophysiol.*, 28(6):1029–1040.
- 1567 Wiesel, T. N. and Hubel, D. H. (1965b). Extent of recovery from the effects of visual deprivation in  
1568 kittens. *J. Neurophysiol.*, 28(6):1060–1072.
- 1569 Wiesel, T. N., Hubel, D. H., and Others (1963). Effects of visual deprivation on morphology and  
1570 physiology of cells in the cat's lateral geniculate body. *J. Neurophysiol.*, 26(978):6.
- 1571 Winawer, J., Horiguchi, H., Sayres, R. A., Amano, K., and Wandell, B. A. (2010). Mapping hv4 and  
1572 ventral occipital cortex: the venous eclipse. *J. Vis.*, 10:1.
- 1573 Winawer, J. and Witthoft, N. (2015). Human V4 and ventral occipital retinotopic maps. *Vis. Neu-*  
1574 *rosci.*, 32:E020.
- 1575 Wolf, I., Vetter, M., Wegner, I., Böttger, T., Nolden, M., Schöbinger, M., Hastenteufel, M., Kunert, T.,  
1576 and Meinzer, H.-P. (2005). The medical imaging interaction toolkit. *Med. Image Anal.*, 9(6):594–  
1577 604.
- 1578 Xue, R., van Zijl, P., Crain, B. J., Solaiyappan, M., and Mori, S. (1999). In vivo three-dimensional  
1579 reconstruction of rat brain axonal projections by diffusion tensor imaging. *Magn. Reson. Med.*,  
1580 42(6):1123–1127.
- 1581 Yaffe, M. B. (2015). Reproducibility in science. *Sci. Signal.*, 8(371):eg5–eg5.
- 1582 Yeatman, J. D., Dougherty, R. F., Myall, N. J., Wandell, B. A., and Feldman, H. M. (2012). Tract pro-  
1583 files of white matter properties: automating fiber-tract quantification. *PLoS One*, 7(11):e49790.
- 1584 Yeatman, J. D., Dougherty, R. F., Rykhlevskaia, E., Sherbondy, A. J., Deutsch, G. K., Wandell,  
1585 B. A., and Ben-Shachar, M. (2011). Anatomical properties of the arcuate fasciculus predict  
1586 phonological and reading skills in children. *J. Cogn. Neurosci.*, 23(11):3304–3317.
- 1587 Yeatman, J. D., Rauschecker, A. M., and Wandell, B. A. (2013). Anatomy of the visual word form  
1588 area: adjacent cortical circuits and long-range white matter connections. *Brain Lang.*, 125:146–  
1589 155.
- 1590 Yeatman, J. D., Wandell, B. A., and Mezer, A. A. (2014a). Lifespan maturation and degeneration  
1591 of human brain white matter. *Nat. Commun.*, 5:4932.
- 1592 Yeatman, J. D., Weiner, K. S., Pestilli, F., Rokem, A., Mezer, A., and Wandell, B. A. (2014b). The  
1593 vertical occipital fasciculus: a century of controversy resolved by in vivo measurements. *Proc.*  
1594 *Natl. Acad. Sci. U. S. A.*, 111(48):E5214–23.
- 1595 Yendiki, A., Panneck, P., Srinivasan, P., Stevens, A., Zöllei, L., Augustinack, J., Wang, R., Salat,  
1596 D., Ehrlich, S., Behrens, T., Jbabdi, S., Gollub, R., and Fischl, B. (2011). Automated probabilistic  
1597 reconstruction of white-matter pathways in health and disease using an atlas of the underlying  
1598 anatomy. *Front. Neuroinform.*, 5:23.
- 1599 Zhang, H., Awate, S. P., Das, S. R., Woo, J. H., Melhem, E. R., Gee, J. C., and Yushkevich, P. A.  
1600 (2010). A tract-specific framework for white matter morphometry combining macroscopic and  
1601 microscopic tract features. *Med. Image Anal.*, 14(5):666–673.

1602 Zhang, H., Schneider, T., Wheeler-Kingshott, C. A., and Alexander, D. C. (2012). NODDI: practical  
1603 in vivo neurite orientation dispersion and density imaging of the human brain. *Neuroimage*,  
1604 61:1000–1016.
